# Supplementary material for: Progesterone Receptor Signaling Selectively Modulates Cytokine-Induced Global Gene Expression in Human Cervical Stromal Cells
Source: Front Genet. 2020 Sep 11;11:883. doi: 10.3389/fgene.2020.00883 (PMC7517718; doi:10.3389/fgene.2020.00883)
Supplement: Supplementary file 4 [file Table_4.XLSX]

## Sheet: Sheet1
TABLE S4. TRAP analysis of transcription factor binding motif overrepresentation in cervical stromal fibroblasts stimulated with IL-1b for 4 hrs.
Rank	Chi-squared	p value	Matrix ID	Matrix name
1	899	3.7e-10	MA0107.1	RELA
2	869	1.22e-08	MA0051.1	IRF2
3	868	1.22e-08	MA0101.1	REL
4	851	9.76e-08	MA0050.1	IRF1
5	836	5.73e-07	MA0073.1	RREB1
6	801	3.71e-05	MA0057.1	MZF1_5-13
7	797	5.24e-05	MA0040.1	Foxq1
8	792	8.12e-05	MA0061.1	NF-kappaB
9	773	0.000538	MA0132.1	Pdx1
10	770	0.00066	MA0137.2	STAT1
11	762	0.00123	MA0144.1	Stat3
12	762	0.00123	MA0080.2	SPI1
13	755	0.00222	MA0156.1	FEV
14	753	0.00231	MA0030.1	FOXF2
15	753	0.00231	MA0024.1	E2F1
16	751	0.00238	MA0035.2	Gata1
17	751	0.00238	MA0111.1	Spz1
18	750	0.00257	MA0157.1	FOXO3
19	749	0.00261	MA0142.1	Pou5f1
20	747	0.00289	MA0087.1	Sox5
21	746	0.003	MA0105.1	NFKB1
22	746	0.003	MA0079.2	SP1
23	745	0.00315	MA0099.2	AP1
24	742	0.00392	MA0084.1	SRY
25	739	0.00481	MA0090.1	TEAD1
26	734	0.00694	MA0052.1	MEF2A
27	730	0.0092	MA0152.1	NFATC2
28	729	0.00933	MA0031.1	FOXD1
29	723	0.015	MA0125.1	Nobox
30	722	0.015	MA0158.1	HOXA5
31	722	0.015	MA0155.1	INSM1
32	721	0.0157	MA0047.2	Foxa2
33	720	0.0158	MA0136.1	ELF5
34	715	0.0231	MA0100.1	Myb
35	713	0.0256	MA0017.1	NR2F1
36	711	0.0274	MA0066.1	PPARG
37	711	0.0274	MA0068.1	Pax4
38	711	0.0274	MA0075.1	Prrx2
39	710	0.0288	MA0114.1	HNF4A
40	709	0.0296	MA0083.1	SRF
41	708	0.0301	MA0124.1	NKX3-1
42	708	0.0301	MA0042.1	FOXI1
43	707	0.0312	MA0143.1	Sox2
44	701	0.045	MA0151.1	ARID3A
