# Supplementary material for: Progesterone Receptor Signaling Selectively Modulates Cytokine-Induced Global Gene Expression in Human Cervical Stromal Cells
Source: Front Genet. 2020 Sep 11;11:883. doi: 10.3389/fgene.2020.00883 (PMC7517718; doi:10.3389/fgene.2020.00883)
Supplement: Supplementary file 9 [file Table_9.XLSX]

## Sheet: Sheet1
TABLE S9. Differentially expressed transcripts in cervical stromal fibroblasts co-incubated with P4 and IL-1b for 4 hrs.
Gene Symbol	Description	Fold Change	FDR p-value
CXCL8	chemokine (C-X-C motif) ligand 8	7781.51	3e-06
TNFAIP2	tumor necrosis factor, alpha-induced protein 2	2052.65	0.000112
PTGS2	prostaglandin-endoperoxide synthase 2 (prostaglandin G/H synthase and cyclooxygenase)	2047.62	3.2e-05
CXCL1	chemokine (C-X-C motif) ligand 1 (melanoma growth stimulating activity, alpha)	1889.08	0.000144
CXCL10	chemokine (C-X-C motif) ligand 10	1344.23	0.000313
ICAM1	intercellular adhesion molecule 1	941.08	0.000118
TNFAIP3	tumor necrosis factor, alpha-induced protein 3	661.97	8.4e-05
CXCL6	chemokine (C-X-C motif) ligand 6	630.54	9.5e-05
CSF3	colony stimulating factor 3 (granulocyte)	509.39	0.000188
SRGN	serglycin	424.45	0.000434
TNFAIP6	tumor necrosis factor, alpha-induced protein 6	383.13	7.9e-05
CCL7	chemokine (C-C motif) ligand 7	270.93	0.00028
BIRC3	baculoviral IAP repeat containing 3	243.4	2.5e-05
CCL8	chemokine (C-C motif) ligand 8	222.76	9.2e-05
LIF	leukemia inhibitory factor	218.68	0.000125
GCH1	GTP cyclohydrolase 1	212.43	0.000119
G0S2	G0/G1 switch 2	211.24	0.00038
CXCL2	chemokine (C-X-C motif) ligand 2	206.71	0.000425
CXCL5	chemokine (C-X-C motif) ligand 5	189.74	0.00045
PTX3	pentraxin 3, long	176.06	0.000718
RIPK2	receptor-interacting serine-threonine kinase 2	153.45	7.9e-05
IL6	interleukin 6	144.48	0.000144
CCL2	chemokine (C-C motif) ligand 2	142.9	0.00163
CYP7B1	cytochrome P450, family 7, subfamily B, polypeptide 1	130.01	0.005387
VCAM1	vascular cell adhesion molecule 1	100.36	0.001079
IFIT2	interferon-induced protein with tetratricopeptide repeats 2	97.66	0.00038
HSD11B1	hydroxysteroid (11-beta) dehydrogenase 1	93.12	0.000719
NFKBIA	nuclear factor of kappa light polypeptide gene enhancer in B-cells inhibitor, alpha	81.96	0.000263
NKX3-1	NK3 homeobox 1	80.55	0.000296
CFB	complement factor B	77.53	0.000309
CCL20	chemokine (C-C motif) ligand 20	72.14	0.008456
RSAD2	radical S-adenosyl methionine domain containing 2	68.14	0.004983
CD274	CD274 molecule	67.71	0.001142
IL7R	interleukin 7 receptor	65.47	0.004398
NFKB1	nuclear factor of kappa light polypeptide gene enhancer in B-cells 1	65.38	0.000463
NFKBIZ	nuclear factor of kappa light polypeptide gene enhancer in B-cells inhibitor, zeta	56.95	3.2e-05
IFIT1	interferon-induced protein with tetratricopeptide repeats 1	53.93	0.002504
CCL11	chemokine (C-C motif) ligand 11	53.45	0.000959
SLC39A14	solute carrier family 39 (zinc transporter), member 14	49.38	7.1e-05
BDKRB1	bradykinin receptor B1	48.83	9.4e-05
SOD2	superoxide dismutase 2, mitochondrial	48.62	0.001102
SLC39A8	solute carrier family 39 (zinc transporter), member 8	47.64	0.001369
IL33	interleukin 33	43.5	0.002058
KYNU	kynureninase	41.93	0.002523
GBP1	guanylate binding protein 1, interferon-inducible	40.69	0.000263
SLC7A2	solute carrier family 7 (cationic amino acid transporter, y+ system), member 2	40.47	0.000977
ZC3H12C	zinc finger CCCH-type containing 12C	38.89	0.000384
SAT1	spermidine/spermine N1-acetyltransferase 1	34.31	0.000719
IFIT3	interferon-induced protein with tetratricopeptide repeats 3	33.87	0.000493
GBP4	guanylate binding protein 4	33.73	0.00038
ACSL4	acyl-CoA synthetase long-chain family member 4	33.45	0.001336
CSF1	colony stimulating factor 1 (macrophage)	33.44	0.00136
TNFRSF11B	tumor necrosis factor receptor superfamily, member 11b	33.42	0.001402
NR4A3	nuclear receptor subfamily 4, group A, member 3	32.2	0.003743
IFIH1	interferon induced with helicase C domain 1	32.11	0.001386
IRAK2	interleukin-1 receptor-associated kinase 2	31.62	3.2e-05
NAMPTL	nicotinamide phosphoribosyltransferase-like	30.3	0.00343
PIM2	Pim-2 proto-oncogene, serine/threonine kinase	30.1	0.000305
NAMPT	nicotinamide phosphoribosyltransferase	30.01	0.006077
CXCL3	chemokine (C-X-C motif) ligand 3	28.58	0.000618
MIR155HG	MIR155 host gene (non-protein coding)	27.01	0.001026
MYB	v-myb avian myeloblastosis viral oncogene homolog	26.92	3.2e-05
EREG	epiregulin	26.85	0.019373
IFI44	interferon-induced protein 44	26.79	0.005284
REL	v-rel avian reticuloendotheliosis viral oncogene homolog	25.92	0.006656
GBP3	guanylate binding protein 3	25.86	8.5e-05
MAP3K5	mitogen-activated protein kinase kinase kinase 5	25.18	0.00038
TLCD1	TLC domain containing 1	24.64	0.000118
CLDN1	claudin 1	24.46	0.006512
IL1B	interleukin 1, beta	24.19	0.000106
TNIP1	TNFAIP3 interacting protein 1	23.41	0.000145
MSC	musculin	21.55	0.000294
ADAMTS4	ADAM metallopeptidase with thrombospondin type 1 motif, 4	21.43	0.00085
GBP1P1	guanylate binding protein 1, interferon-inducible pseudogene 1	20.83	0.000434
MFSD2A	major facilitator superfamily domain containing 2A	20.72	0.000653
FGF10	fibroblast growth factor 10	20.63	0.008668
SERPINE1	serpin peptidase inhibitor, clade E (nexin, plasminogen activator inhibitor type 1), member 1	20.57	0.002571
IFNAR2	interferon (alpha, beta and omega) receptor 2	20.5	0.000511
BCL2A1	BCL2-related protein A1	19.78	0.000791
IRAK3	interleukin-1 receptor-associated kinase 3	19.75	0.002571
PTGES	prostaglandin E synthase	19.38	0.001578
ITGB8	integrin, beta 8	19.34	0.000425
GFPT2	glutamine-fructose-6-phosphate transaminase 2	18.96	0.000328
TRPA1	transient receptor potential cation channel, subfamily A, member 1	18.85	0.000398
TRIM25; MIR3614	tripartite motif containing 25; microRNA 3614	18.73	0.000463
NFKB2	nuclear factor of kappa light polypeptide gene enhancer in B-cells 2 (p49/p100)	18.49	0.000328
WTAP	Wilms tumor 1 associated protein	18.15	0.000322
RNF19B	ring finger protein 19B	17.81	0.0013
SLC22A3	solute carrier family 22 (organic cation transporter), member 3	17.47	0.00783
DDX58	DEAD (Asp-Glu-Ala-Asp) box polypeptide 58	17.13	0.001666
ZC3H12A; MIR6732	zinc finger CCCH-type containing 12A; microRNA 6732	16.9	0.000263
OAS2	2-5-oligoadenylate synthetase 2, 69/71kDa	16.65	0.002665
EDNRB	endothelin receptor type B	16.44	0.001318
C15orf48; MIR147B	chromosome 15 open reading frame 48; microRNA 147b	16.3	0.001478
CX3CL1	chemokine (C-X3-C motif) ligand 1	15.98	0.008489
CH25H	cholesterol 25-hydroxylase	15.91	0.00151
STX11	syntaxin 11	15.86	0.001402
LCP1	lymphocyte cytosolic protein 1 (L-plastin)	15.84	0.000425
IFI44L	interferon-induced protein 44-like	15.59	0.012446
PMAIP1	phorbol-12-myristate-13-acetate-induced protein 1	15.38	0.001318
SLC25A37	solute carrier family 25 (mitochondrial iron transporter), member 37	15.29	0.000119
KRT34	keratin 34	15.21	0.038516
LOC541472	uncharacterized LOC541472	15.16	0.002764
PARP14	poly (ADP-ribose) polymerase family, member 14	15.13	0.001336
TFPI2	tissue factor pathway inhibitor 2	15.08	0.001197
BID	BH3 interacting domain death agonist	14.69	0.000304
NINJ1	ninjurin 1	14.68	0.000504
MARCH3	membrane-associated ring finger (C3HC4) 3, E3 ubiquitin protein ligase	14.52	0.000144
RNF144B	ring finger protein 144B	14.49	0.007569
CXCL11	chemokine (C-X-C motif) ligand 11	14.25	0.009099
DIO2	deiodinase, iodothyronine, type II	14.22	0.010534
MAP3K8	mitogen-activated protein kinase kinase kinase 8	13.89	0.000302
RCAN1	regulator of calcineurin 1	13.73	0.001715
IER3	immediate early response 3	13.61	0.0013
STAT5A	signal transducer and activator of transcription 5A	13.5	0.001831
CAMK1G	calcium/calmodulin-dependent protein kinase IG	12.86	0.000313
SQRDL	sulfide quinone reductase-like (yeast)	12.84	0.001026
SAMD9L	sterile alpha motif domain containing 9-like	12.77	0.000275
AC073316.1	putative novel transcript	12.75	0.003847
ERN1	endoplasmic reticulum to nucleus signaling 1	12.75	0.000893
ELOVL7	ELOVL fatty acid elongase 7	12.74	0.002757
INSIG1	insulin induced gene 1	12.66	0.000613
IFI30	interferon, gamma-inducible protein 30	12.14	0.001368
STEAP2	STEAP family member 2, metalloreductase	11.99	0.003314
SLC43A3	solute carrier family 43, member 3	11.73	0.000244
MX1	myxovirus (influenza virus) resistance 1, interferon-inducible protein p78 (mouse)	11.17	0.011614
SPARCL1	SPARC-like 1 (hevin)	11.13	0.078345
OXTR	oxytocin receptor	11.07	0.004576
STEAP1	six transmembrane epithelial antigen of the prostate 1	10.92	0.002528
SULT1C4	sulfotransferase family, cytosolic, 1C, member 4	10.89	0.002951
IL15RA	interleukin 15 receptor, alpha	10.75	0.000359
CRISPLD2	cysteine-rich secretory protein LCCL domain containing 2	10.7	0.003007
CYLD	cylindromatosis (turban tumor syndrome)	10.7	0.00086
HIVEP2	human immunodeficiency virus type I enhancer binding protein 2	10.66	0.000223
TAP1	transporter 1, ATP-binding cassette, sub-family B (MDR/TAP)	10.66	0.001465
CTSS	cathepsin S	10.4	0.0013
TIFA	TRAF-interacting protein with forkhead-associated domain	10.39	0.000123
APOL2	apolipoprotein L, 2	10.2	0.00054
ZNFX1	zinc finger, NFX1-type containing 1	10.14	0.000101
IFIT5	interferon-induced protein with tetratricopeptide repeats 5	9.99	0.000704
LYN	LYN proto-oncogene, Src family tyrosine kinase	9.91	0.002339
C3	complement component 3	9.77	0.00645
SLC7A1	solute carrier family 7 (cationic amino acid transporter, y+ system), member 1	9.72	0.002126
BAZ1A	bromodomain adjacent to zinc finger domain, 1A	9.68	0.000272
IFNGR2	interferon gamma receptor 2 (interferon gamma transducer 1)	9.66	0.000223
MMD	monocyte to macrophage differentiation-associated	9.64	0.014725
SLFN5	schlafen family member 5	9.59	0.00075
BDKRB2	bradykinin receptor B2	9.58	0.001255
TNFSF15	tumor necrosis factor (ligand) superfamily, member 15	9.5	0.00378
MIRLET7I	microRNA let-7i	9.32	0.00136
ARHGAP31	Rho GTPase activating protein 31	9.14	8.1e-05
DDX21	DEAD (Asp-Glu-Ala-Asp) box helicase 21	9.09	0.00209
UGP2	UDP-glucose pyrophosphorylase 2	9.05	0.013506
CD38	CD38 molecule	9	0.010462
PPP1R15B	protein phosphatase 1, regulatory subunit 15B	8.99	0.002719
CPNE8	copine VIII	8.92	0.006833
GPD2	glycerol-3-phosphate dehydrogenase 2 (mitochondrial)	8.86	0.00038
AMPD3	adenosine monophosphate deaminase 3	8.82	7.1e-05
SELE	selectin E	8.79	0.031097
MAML2	mastermind-like 2 (Drosophila)	8.72	0.0013
POPDC2	popeye domain containing 2	8.69	0.003436
TP53BP2	tumor protein p53 binding protein 2	8.69	0.000123
CD82	CD82 molecule	8.65	0.000145
RP11-439L18.1	putative novel transcript	8.6	0.00136
LOC440896	uncharacterized LOC440896	8.57	0.017812
PLA2G4A	phospholipase A2, group IVA (cytosolic, calcium-dependent)	8.56	0.003975
IL1A	interleukin 1, alpha	8.49	0.008748
AC092168.2	novel transcript	8.47	0.012618
MIR4521	microRNA 4521	8.45	0.006706
ARSJ	arylsulfatase family, member J	8.39	0.003851
FRK	fyn-related Src family tyrosine kinase	8.38	0.000313
NFKBIE	nuclear factor of kappa light polypeptide gene enhancer in B-cells inhibitor, epsilon	8.36	0.000893
GBP2	guanylate binding protein 2, interferon-inducible	8.33	0.002133
OMD	osteomodulin	8.28	0.010002
NPAS2	neuronal PAS domain protein 2	8.25	0.0003
FGF2	fibroblast growth factor 2 (basic)	8.19	0.000732
PPP4R4	protein phosphatase 4, regulatory subunit 4	8.18	0.005327
XBP1	X-box binding protein 1	8.16	0.000673
NAV3	neuron navigator 3	8.15	0.00979
ZFPM2	zinc finger protein, FOG family member 2	8.13	0.003007
PDPN	podoplanin	8.04	0.00075
FMNL3	formin-like 3	7.99	5.3e-05
NEDD1	neural precursor cell expressed, developmentally down-regulated 1	7.84	0.008798
RP11-642D21.1	putative novel transcript	7.84	0.024792
SLC43A2	solute carrier family 43 (amino acid system L transporter), member 2	7.81	7.9e-05
CFLAR	CASP8 and FADD-like apoptosis regulator	7.78	0.001214
RNF145	ring finger protein 145	7.77	0.002326
PANX1	pannexin 1	7.66	0.001341
HIF1A	hypoxia inducible factor 1, alpha subunit (basic helix-loop-helix transcription factor)	7.6	7.9e-05
SIRPA	signal-regulatory protein alpha	7.59	0.000943
TMEM2	transmembrane protein 2	7.54	0.000474
EPSTI1	epithelial stromal interaction 1 (breast)	7.5	0.010452
CADM1	cell adhesion molecule 1	7.45	0.000398
OASL	2-5-oligoadenylate synthetase-like	7.44	0.009274
LIPG	lipase, endothelial	7.41	0.006001
HS3ST3B1	heparan sulfate (glucosamine) 3-O-sulfotransferase 3B1	7.39	0.006524
USP13	ubiquitin specific peptidase 13 (isopeptidase T-3)	7.38	0.000453
LAP3	leucine aminopeptidase 3	7.35	0.006504
CHI3L2	chitinase 3-like 2	7.31	0.000305
PARP12	poly (ADP-ribose) polymerase family, member 12	7.3	0.000791
B4GALT5	UDP-Gal:betaGlcNAc beta 1,4- galactosyltransferase, polypeptide 5	7.28	0.000696
USP18	ubiquitin specific peptidase 18	7.27	0.011543
ATF3	activating transcription factor 3	7.23	0.001653
PLSCR1	phospholipid scramblase 1	7	0.003975
TMEM63B	transmembrane protein 63B	6.97	0.000144
HDX	highly divergent homeobox	6.95	0.002642
LRIG1	leucine-rich repeats and immunoglobulin-like domains 1	6.9	8.9e-05
BTG3	BTG family, member 3	6.88	0.0013
OSGIN2	oxidative stress induced growth inhibitor family member 2	6.87	0.000428
ALPK2	alpha-kinase 2	6.86	0.001566
MIR4451	microRNA 4451	6.8	0.004497
ATP2B1	ATPase, Ca++ transporting, plasma membrane 1	6.78	0.000877
SLC11A2	solute carrier family 11 (proton-coupled divalent metal ion transporter), member 2	6.77	0.000272
MIR222	microRNA 222	6.76	0.001362
SNAPC1	small nuclear RNA activating complex, polypeptide 1, 43kDa	6.75	0.00011
FLVCR2	feline leukemia virus subgroup C cellular receptor family, member 2	6.71	0.009716
SH3PXD2B	SH3 and PX domains 2B	6.67	0.000244
RASSF5	Ras association (RalGDS/AF-6) domain family member 5	6.6	0.007896
STC1	stanniocalcin 1	6.56	0.019806
PSTPIP2	proline-serine-threonine phosphatase interacting protein 2	6.53	0.00075
MYBL1	v-myb avian myeloblastosis viral oncogene homolog-like 1	6.51	0.046066
TNFRSF10B	tumor necrosis factor receptor superfamily, member 10b	6.51	0.000977
PAPPA	pregnancy-associated plasma protein A, pappalysin 1	6.5	0.007841
SAMD9	sterile alpha motif domain containing 9	6.44	0.001204
SLC25A28	solute carrier family 25 (mitochondrial iron transporter), member 28	6.36	0.00086
GK5	glycerol kinase 5 (putative)	6.34	0.002541
B4GALT1	UDP-Gal:betaGlcNAc beta 1,4- galactosyltransferase, polypeptide 1	6.17	0.000533
IRF1	interferon regulatory factor 1	6.12	0.000169
NCR3LG1	natural killer cell cytotoxicity receptor 3 ligand 1	6.12	0.03335
LOC101929709	uncharacterized LOC101929709	6.08	0.005508
LOC101929179	uncharacterized LOC101929179	6.07	0.030508
RBBP8; MIR4741	retinoblastoma binding protein 8; microRNA 4741	6	0.006041
RP11-70J12.1	putative novel transcript	5.97	0.03052
APOL3	apolipoprotein L, 3	5.9	0.000169
NBN	nibrin	5.88	0.000622
NR4A2	nuclear receptor subfamily 4, group A, member 2	5.85	0.044533
SLC2A1	solute carrier family 2 (facilitated glucose transporter), member 1	5.82	0.014771
CD44	CD44 molecule (Indian blood group)	5.8	0.001262
DDX60	DEAD (Asp-Glu-Ala-Asp) box polypeptide 60	5.74	0.000713
UGCG	UDP-glucose ceramide glucosyltransferase	5.72	0.002437
IL15	interleukin 15	5.71	0.026134
FNDC3B	fibronectin type III domain containing 3B	5.69	0.001224
PRICKLE2	prickle homolog 2 (Drosophila)	5.67	0.004684
MT1CP	metallothionein 1C, pseudogene	5.65	0.001214
HSPA13	heat shock protein 70kDa family, member 13	5.64	0.004273
PLAT	plasminogen activator, tissue	5.61	0.000903
NNMT	nicotinamide N-methyltransferase	5.6	0.002309
POU2F2	POU class 2 homeobox 2	5.59	0.0001
DNAJA1	DnaJ (Hsp40) homolog, subfamily A, member 1	5.53	0.000843
JUN	jun proto-oncogene	5.51	0.016761
OTUD4	OTU deubiquitinase 4	5.51	0.000463
PDCD1LG2	programmed cell death 1 ligand 2	5.48	0.018182
TNFRSF1B; MIR4632	tumor necrosis factor receptor superfamily, member 1B; microRNA 4632	5.46	0.00282
HERC6	HECT and RLD domain containing E3 ubiquitin protein ligase family member 6	5.44	0.045224
MT1X	metallothionein 1X	5.42	0.00336
SLFN11	schlafen family member 11	5.41	0.000323
RTP4	receptor (chemosensory) transporter protein 4	5.39	0.003199
XAF1	XIAP associated factor 1	5.37	0.005311
PLA1A	phospholipase A1 member A	5.34	0.00038
PPP3CC	protein phosphatase 3, catalytic subunit, gamma isozyme	5.32	0.000144
PLAUR	plasminogen activator, urokinase receptor	5.28	0.000833
SDC4	syndecan 4	5.28	0.000384
HSPA1B	heat shock 70kDa protein 1B	5.27	0.000263
NMI	N-myc (and STAT) interactor	5.27	0.00438
KIAA1217	KIAA1217	5.26	0.005327
IFI6	interferon, alpha-inducible protein 6	5.24	0.015122
TRIM21	tripartite motif containing 21	5.21	0.000322
SLC19A2	solute carrier family 19 (thiamine transporter), member 2	5.2	0.040244
HAS2	hyaluronan synthase 2	5.19	0.002343
RND3	Rho family GTPase 3	5.19	0.00187
OGFRL1	opioid growth factor receptor-like 1	5.15	0.009996
LRRC49	leucine rich repeat containing 49	5.12	0.006872
OAS1	2-5-oligoadenylate synthetase 1, 40/46kDa	5.1	0.014574
ABI3BP	ABI family, member 3 (NESH) binding protein	5.05	0.037037
SEMA6A	sema domain, transmembrane domain (TM), and cytoplasmic domain, (semaphorin) 6A	5.05	0.001808
MMP12	matrix metallopeptidase 12 (macrophage elastase)	5	0.038874
SLC16A6	solute carrier family 16, member 6	4.97	0.01967
WISP1	WNT1 inducible signaling pathway protein 1	4.95	0.000867
AFAP1	actin filament associated protein 1	4.92	0.000416
SERPINB8	serpin peptidase inhibitor, clade B (ovalbumin), member 8	4.91	0.00054
CHST11	carbohydrate (chondroitin 4) sulfotransferase 11	4.89	0.0032
CD47	CD47 molecule	4.88	0.001566
EFNB1	ephrin-B1	4.86	0.000416
PLPP3	phospholipid phosphatase 3	4.86	0.008907
CDK6	cyclin-dependent kinase 6	4.82	0.00259
GPR84	G protein-coupled receptor 84	4.82	0.007779
ZNF267	zinc finger protein 267	4.82	0.000413
TRAF1	TNF receptor-associated factor 1	4.79	0.000384
CBR3	carbonyl reductase 3	4.78	0.002951
PNRC2	proline-rich nuclear receptor coactivator 2	4.78	0.00151
CCDC71L	coiled-coil domain containing 71-like	4.76	0.030429
ENC1	ectodermal-neural cortex 1 (with BTB domain)	4.76	0.004314
FUT8	fucosyltransferase 8 (alpha (1,6) fucosyltransferase)	4.76	0.002876
TMEM171	transmembrane protein 171	4.76	0.034381
C1QTNF1	C1q and tumor necrosis factor related protein 1	4.71	0.001483
PAPPA-AS1	PAPPA antisense RNA 1	4.71	0.006439
SP110	SP110 nuclear body protein	4.67	0.005024
CASP7	caspase 7, apoptosis-related cysteine peptidase	4.65	0.000305
HBEGF	heparin-binding EGF-like growth factor	4.64	0.001721
PTPN2	protein tyrosine phosphatase, non-receptor type 2	4.64	0.001304
TWISTNB	TWIST neighbor	4.64	0.010286
JAK2	Janus kinase 2	4.63	0.000463
BHLHE41	basic helix-loop-helix family, member e41	4.62	0.00095
SMS	spermine synthase	4.62	0.001875
DRAM1	DNA-damage regulated autophagy modulator 1	4.61	0.000387
PLK2	polo-like kinase 2	4.59	0.033006
NUAK2	NUAK family, SNF1-like kinase, 2	4.58	0.004684
MIR221	microRNA 221	4.55	0.002054
GPRC5B	G protein-coupled receptor, class C, group 5, member B	4.53	0.060371
CEP350	centrosomal protein 350kDa	4.52	0.00038
PTPN12	protein tyrosine phosphatase, non-receptor type 12	4.5	0.00151
ATP11C	ATPase, class VI, type 11C	4.46	0.000696
TAP2	transporter 2, ATP-binding cassette, sub-family B (MDR/TAP)	4.44	0.007618
TRAFD1	TRAF-type zinc finger domain containing 1	4.44	0.008781
ALDH1A3	aldehyde dehydrogenase 1 family, member A3	4.43	0.078576
C4orf32	chromosome 4 open reading frame 32	4.43	0.008798
NRG1	neuregulin 1	4.43	0.013632
TNFSF10	tumor necrosis factor (ligand) superfamily, member 10	4.4	0.017929
EPT1	ethanolaminephosphotransferase 1 (CDP-ethanolamine-specific)	4.36	0.002277
MX2	myxovirus (influenza virus) resistance 2 (mouse)	4.35	0.036363
IFNGR1	interferon gamma receptor 1	4.31	0.000893
MT1JP	metallothionein 1J, pseudogene	4.3	0.000811
MT1E	metallothionein 1E	4.28	0.000329
SLC18B1	solute carrier family 18, subfamily B, member 1	4.28	0.003973
IRS2	insulin receptor substrate 2	4.27	0.015297
EGFR	epidermal growth factor receptor	4.26	0.000118
PATL1	protein associated with topoisomerase II homolog 1 (yeast)	4.26	0.000159
SAMD4B	sterile alpha motif domain containing 4B	4.26	5.5e-05
GUCY1A2	guanylate cyclase 1, soluble, alpha 2	4.24	0.045522
ZNF618	zinc finger protein 618	4.24	0.000253
DMXL2	Dmx-like 2	4.23	0.001216
HERC5	HECT and RLD domain containing E3 ubiquitin protein ligase 5	4.23	0.03978
FKBP5	FK506 binding protein 5	4.2	0.021679
ACSL3	acyl-CoA synthetase long-chain family member 3	4.19	0.000416
ARNTL2	aryl hydrocarbon receptor nuclear translocator-like 2	4.19	0.001542
LAMB3; MIR4260	laminin, beta 3; microRNA 4260	4.17	0.002319
FAM208B	family with sequence similarity 208, member B	4.17	0.00137
DENND5A	DENN/MADD domain containing 5A	4.16	0.002053
CLIC6	chloride intracellular channel 6	4.14	0.003124
OAS3	2-5-oligoadenylate synthetase 3, 100kDa	4.12	0.00397
DUSP1	dual specificity phosphatase 1	4.11	0.011318
MT1L	metallothionein 1L (gene/pseudogene)	4.11	0.006353
CMPK2	cytidine monophosphate (UMP-CMP) kinase 2, mitochondrial	4.08	0.009175
RHOG	ras homolog family member G	4.08	0.000291
ZC3HAV1	zinc finger CCCH-type, antiviral 1	4.08	0.011452
DGKH	diacylglycerol kinase, eta	4.06	0.016196
BCL2	B-cell CLL/lymphoma 2	4.05	0.001241
STARD4	StAR-related lipid transfer (START) domain containing 4	4.01	0.012502
MXD1	MAX dimerization protein 1	4	0.006512
PTPN1	protein tyrosine phosphatase, non-receptor type 1	3.98	0.001876
KCNA3	potassium voltage-gated channel, shaker-related subfamily, member 3	3.97	0.020532
SLC12A7	solute carrier family 12 (potassium/chloride transporter), member 7	3.97	0.000843
CYP7A1	cytochrome P450, family 7, subfamily A, polypeptide 1	3.95	0.014008
DCP1A	decapping mRNA 1A	3.94	0.000583
MT1M	metallothionein 1M	3.94	0.005288
OLR1	oxidized low density lipoprotein (lectin-like) receptor 1	3.94	0.004012
TSLP	thymic stromal lymphopoietin	3.94	0.011583
SAMD4A	sterile alpha motif domain containing 4A	3.93	0.001124
IRF2	interferon regulatory factor 2	3.92	0.001105
SERPINE2	serpin peptidase inhibitor, clade E (nexin, plasminogen activator inhibitor type 1), member 2	3.9	0.004579
SLC41A2	solute carrier family 41 (magnesium transporter), member 2	3.9	0.00204
CDKN2B	cyclin-dependent kinase inhibitor 2B (p15, inhibits CDK4)	3.89	0.000811
FRMD4A	FERM domain containing 4A	3.89	0.000368
APOL6	apolipoprotein L, 6	3.87	0.000979
MAMLD1	mastermind-like domain containing 1	3.87	0.004207
SH2B3	SH2B adaptor protein 3	3.87	0.000144
DDX60L	DEAD (Asp-Glu-Ala-Asp) box polypeptide 60-like	3.86	0.012426
APOO	apolipoprotein O	3.85	0.000207
FAS	Fas cell surface death receptor	3.84	0.002571
UXS1	UDP-glucuronate decarboxylase 1	3.84	0.000743
DTX3L	deltex 3 like, E3 ubiquitin ligase	3.81	0.001402
HIF1A-AS1	HIF1A antisense RNA 1	3.81	0.005847
CCL5	chemokine (C-C motif) ligand 5	3.8	0.002115
MMP3	matrix metallopeptidase 3 (stromelysin 1, progelatinase)	3.78	0.002968
PPA1	pyrophosphatase (inorganic) 1	3.78	0.000903
GSAP	gamma-secretase activating protein	3.77	0.003568
SLC7A5	solute carrier family 7 (amino acid transporter light chain, L system), member 5	3.77	0.015492
MYO10	myosin X	3.76	0.01575
ZEB2	zinc finger E-box binding homeobox 2	3.75	0.000503
ETS1	v-ets avian erythroblastosis virus E26 oncogene homolog 1	3.74	0.007013
USP54	ubiquitin specific peptidase 54	3.73	0.013955
DENND4A	DENN/MADD domain containing 4A	3.72	0.005917
MTSS1	metastasis suppressor 1	3.71	6.3e-05
MT2A	metallothionein 2A	3.7	0.004456
LRCH1	leucine-rich repeats and calponin homology (CH) domain containing 1	3.69	0.000253
BCOR	BCL6 corepressor	3.68	0.001284
GK	glycerol kinase	3.68	0.039769
AIM1	absent in melanoma 1	3.67	0.000791
BIRC2	baculoviral IAP repeat containing 2	3.67	0.000312
UAP1	UDP-N-acteylglucosamine pyrophosphorylase 1	3.67	0.011012
ZCCHC2	zinc finger, CCHC domain containing 2	3.66	0.009274
TRIM36	tripartite motif containing 36	3.65	0.001561
MT1B	metallothionein 1B	3.64	0.000419
CASP4	caspase 4, apoptosis-related cysteine peptidase	3.63	0.003396
CCDC50	coiled-coil domain containing 50	3.63	0.003043
DOCK10	dedicator of cytokinesis 10	3.63	0.001368
TMEM39A	transmembrane protein 39A	3.63	0.001284
NOC3L	nucleolar complex associated 3 homolog (S. cerevisiae)	3.62	0.006532
SLCO3A1	solute carrier organic anion transporter family, member 3A1	3.6	0.000101
TMEM165	transmembrane protein 165	3.59	0.001336
DGKE	diacylglycerol kinase, epsilon 64kDa	3.58	0.008136
SDCBP	syndecan binding protein (syntenin)	3.58	0.000799
SPRY4	sprouty homolog 4 (Drosophila)	3.58	0.006828
USP30-AS1	USP30 antisense RNA 1	3.58	0.01927
CCNL1	cyclin L1	3.57	0.00038
MT1F	metallothionein 1F	3.57	0.000463
PRDM1	PR domain containing 1, with ZNF domain	3.57	0.026441
BMPER	BMP binding endothelial regulator	3.56	0.004063
SLC30A7	solute carrier family 30 (zinc transporter), member 7	3.56	0.000791
ANGPTL1	angiopoietin-like 1	3.54	0.004554
MMP1	matrix metallopeptidase 1 (interstitial collagenase)	3.54	0.0458
TFAP2C	transcription factor AP-2 gamma (activating enhancer binding protein 2 gamma)	3.54	0.002406
VTRNA1-3	vault RNA 1-3	3.54	0.001248
ZBTB21	zinc finger and BTB domain containing 21	3.54	0.003436
RBM47	RNA binding motif protein 47	3.53	0.00037
IL17RB	interleukin 17 receptor B	3.51	0.024254
SLC33A1	solute carrier family 33 (acetyl-CoA transporter), member 1	3.51	0.021556
NGF	nerve growth factor (beta polypeptide)	3.49	0.007315
SIK3	SIK family kinase 3	3.49	0.002766
IFI35	interferon-induced protein 35	3.45	0.003296
MCC	mutated in colorectal cancers	3.45	0.004765
NUP188	nucleoporin 188kDa	3.45	0.00082
USP41	ubiquitin specific peptidase 41	3.44	0.024112
CSRNP2	cysteine-serine-rich nuclear protein 2	3.42	0.000719
NOLC1	nucleolar and coiled-body phosphoprotein 1	3.42	0.002886
MT1A	metallothionein 1A	3.41	0.000539
ST5	suppression of tumorigenicity 5	3.41	0.000125
GEM	GTP binding protein overexpressed in skeletal muscle	3.39	0.01099
DGKI	diacylglycerol kinase, iota	3.38	0.030807
ITGA1	integrin, alpha 1	3.38	0.015711
NEDD4L	neural precursor cell expressed, developmentally down-regulated 4-like, E3 ubiquitin protein ligase	3.38	0.00095
CAMK1D	calcium/calmodulin-dependent protein kinase ID	3.37	6.3e-05
CARD6	caspase recruitment domain family, member 6	3.37	0.017269
TAF13	TAF13 RNA polymerase II, TATA box binding protein (TBP)-associated factor, 18kDa	3.37	0.007063
APOL1	apolipoprotein L, 1	3.35	0.007189
ARRDC3	arrestin domain containing 3	3.35	0.006269
SPEN	spen family transcriptional repressor	3.35	0.000973
RASAL2	RAS protein activator like 2	3.34	0.00342
TMEM106A	transmembrane protein 106A	3.33	0.018454
METTL1	methyltransferase like 1	3.32	0.002799
RELB	v-rel avian reticuloendotheliosis viral oncogene homolog B	3.32	0.000203
TNFAIP8	tumor necrosis factor, alpha-induced protein 8	3.32	0.001368
HK2	hexokinase 2	3.31	0.001483
MMP10	matrix metallopeptidase 10 (stromelysin 2)	3.31	0.064049
SLC16A1	solute carrier family 16 (monocarboxylate transporter), member 1	3.31	0.024277
ANKLE2	ankyrin repeat and LEM domain containing 2	3.3	0.001214
ARHGAP29	Rho GTPase activating protein 29	3.3	0.009607
PRRG4	proline rich Gla (G-carboxyglutamic acid) 4 (transmembrane)	3.29	0.000665
MT1H	metallothionein 1H	3.28	0.000667
USP42	ubiquitin specific peptidase 42	3.28	0.001986
HIVEP1	human immunodeficiency virus type I enhancer binding protein 1	3.27	0.000398
PLK3	polo-like kinase 3	3.27	0.004563
AHR	aryl hydrocarbon receptor	3.26	0.012571
NCOA7	nuclear receptor coactivator 7	3.26	0.007294
RNU6-892P	RNA, U6 small nuclear 892, pseudogene	3.26	0.033976
CD83	CD83 molecule	3.25	0.018151
HSPA1A	heat shock 70kDa protein 1A	3.25	0.000463
NUB1	negative regulator of ubiquitin-like proteins 1	3.25	0.002054
TRAF3IP2	TRAF3 interacting protein 2	3.25	0.001137
PRKD3	protein kinase D3	3.24	3.2e-05
EXT1	exostosin glycosyltransferase 1	3.23	0.000425
HIVEP3	human immunodeficiency virus type I enhancer binding protein 3	3.23	0.000622
SHB	Src homology 2 domain containing adaptor protein B	3.23	0.004606
CHIC2	cysteine-rich hydrophobic domain 2	3.22	0.000302
AKAP2	A kinase (PRKA) anchor protein 2	3.2	0.00139
RP11-142M10.2	novel transcript	3.2	0.024277
GPRC5A; MIR614	G protein-coupled receptor, class C, group 5, member A; microRNA 614	3.19	0.002106
FAM129A	family with sequence similarity 129, member A	3.19	0.007767
C5orf15	chromosome 5 open reading frame 15	3.18	0.006919
SGK1	serum/glucocorticoid regulated kinase 1	3.17	0.017269
TLR4	toll-like receptor 4	3.17	0.000775
MTF1	metal-regulatory transcription factor 1	3.16	0.000875
PRLR	prolactin receptor	3.16	0.067584
NAV2	neuron navigator 2	3.15	0.001987
ST3GAL1	ST3 beta-galactoside alpha-2,3-sialyltransferase 1	3.15	0.013902
C21orf91	chromosome 21 open reading frame 91	3.13	0.000145
PELI1	pellino E3 ubiquitin protein ligase 1	3.13	0.001686
ADM	adrenomedullin	3.12	0.003789
CCRN4L	CCR4 carbon catabolite repression 4-like (S. cerevisiae)	3.12	0.006791
CCL1	chemokine (C-C motif) ligand 1	3.11	0.038862
KLF5	Kruppel-like factor 5 (intestinal)	3.11	0.002043
NRP2	neuropilin 2	3.1	0.000144
XRN1	5-3 exoribonuclease 1	3.1	0.002827
ADAM17	ADAM metallopeptidase domain 17	3.09	0.000791
ABTB2	ankyrin repeat and BTB (POZ) domain containing 2	3.08	0.002875
BCL10	B-cell CLL/lymphoma 10	3.08	0.003013
C9orf16	chromosome 9 open reading frame 16	3.08	0.018062
PSMB9	proteasome (prosome, macropain) subunit, beta type, 9	3.08	0.00086
TAPBP	TAP binding protein (tapasin)	3.08	0.000463
NR3C1	nuclear receptor subfamily 3, group C, member 1 (glucocorticoid receptor)	3.07	3.2e-05
CEPT1	choline/ethanolamine phosphotransferase 1	3.06	0.001581
POGLUT1	protein O-glucosyltransferase 1	3.06	0.002895
CIRH1A	cirrhosis, autosomal recessive 1A (cirhin)	3.05	0.001121
RNF19A	ring finger protein 19A, RBR E3 ubiquitin protein ligase	3.05	0.001293
KIAA0247	KIAA0247	3.04	0.010941
NUP62	nucleoporin 62kDa	3.04	0.000299
SIRPAP1	signal-regulatory protein alpha pseudogene 1	3.04	0.009374
CDK17	cyclin-dependent kinase 17	3.03	0.000425
TAB2	TGF-beta activated kinase 1/MAP3K7 binding protein 2	3.03	0.000634
ALAS1	aminolevulinate, delta-, synthase 1	3.02	0.003567
LACC1	laccase (multicopper oxidoreductase) domain containing 1	3.01	0.001004
EHD1	EH-domain containing 1	3	0.00075
PML	promyelocytic leukemia	3	0.00038
CGNL1	cingulin-like 1	2.99	0.003653
EML4	echinoderm microtubule associated protein like 4	2.99	0.000444
CASP3	caspase 3, apoptosis-related cysteine peptidase	2.98	0.003222
METRNL	meteorin, glial cell differentiation regulator-like	2.98	0.003436
SNRPA1	small nuclear ribonucleoprotein polypeptide A	2.98	0.002523
ALCAM	activated leukocyte cell adhesion molecule	2.97	0.005031
ERAP1	endoplasmic reticulum aminopeptidase 1	2.97	0.002319
FAM46A	family with sequence similarity 46, member A	2.95	0.016196
METTL21B	methyltransferase like 21B	2.95	0.0019
PIK3R3	phosphoinositide-3-kinase, regulatory subunit 3 (gamma)	2.95	0.002153
TRAF3	TNF receptor-associated factor 3	2.94	0.002701
STEAP1B	STEAP family member 1B	2.93	0.004486
EIF5	eukaryotic translation initiation factor 5	2.92	0.00075
SERPINB2	serpin peptidase inhibitor, clade B (ovalbumin), member 2	2.92	0.029858
ERVK-7	endogenous retrovirus group K, member 7	2.91	0.0477
GBP5	guanylate binding protein 5	2.91	0.012118
SRGAP1	SLIT-ROBO Rho GTPase activating protein 1	2.91	0.002024
EMP1	epithelial membrane protein 1	2.9	0.025028
TOP1	topoisomerase (DNA) I	2.9	0.000801
BTG1	B-cell translocation gene 1, anti-proliferative	2.89	0.012944
PNPT1	polyribonucleotide nucleotidyltransferase 1	2.89	0.051093
STAT1	signal transducer and activator of transcription 1, 91kDa	2.89	0.026332
INHBA	inhibin, beta A	2.88	0.033186
ZNF217	zinc finger protein 217	2.87	0.003789
EDEM3	ER degradation enhancer, mannosidase alpha-like 3	2.86	0.004949
NHS	Nance-Horan syndrome (congenital cataracts and dental anomalies)	2.86	0.002432
DHX58	DEXH (Asp-Glu-X-His) box polypeptide 58	2.85	0.008438
FST	follistatin	2.85	0.087002
IER5	immediate early response 5	2.85	0.006091
TNIP3	TNFAIP3 interacting protein 3	2.84	0.018041
DNAJB5	DnaJ (Hsp40) homolog, subfamily B, member 5	2.83	0.000889
EGLN1	egl-9 family hypoxia-inducible factor 1	2.83	0.027498
NRIP1	nuclear receptor interacting protein 1	2.83	0.001819
RASSF8	Ras association (RalGDS/AF-6) domain family (N-terminal) member 8	2.83	0.00187
UBE2Z	ubiquitin-conjugating enzyme E2Z	2.83	0.001597
LARP4	La ribonucleoprotein domain family, member 4	2.81	0.008089
PSME2P2	proteasome activator subunit 2 pseudogene 2	2.81	0.000434
USP12	ubiquitin specific peptidase 12	2.81	0.03944
CDC14A	cell division cycle 14A	2.8	0.006108
EIF1B	eukaryotic translation initiation factor 1B	2.8	0.003389
FSTL3	follistatin-like 3 (secreted glycoprotein)	2.8	0.026435
GLTP	glycolipid transfer protein	2.8	0.000993
ITGA5	integrin, alpha 5 (fibronectin receptor, alpha polypeptide)	2.8	0.072951
MCTP1	multiple C2 domains, transmembrane 1	2.8	0.008744
PI4K2A	phosphatidylinositol 4-kinase type 2 alpha	2.8	0.003653
SMURF1	SMAD specific E3 ubiquitin protein ligase 1	2.8	0.000463
PSME2; MIR7703	proteasome (prosome, macropain) activator subunit 2 (PA28 beta); microRNA 7703	2.79	0.000719
GJD3	gap junction protein, delta 3, 31.9kDa	2.79	0.003982
HECW2	HECT, C2 and WW domain containing E3 ubiquitin protein ligase 2	2.79	0.03199
IL1RAP	interleukin 1 receptor accessory protein	2.79	0.023503
MGAT2	mannosyl (alpha-1,6-)-glycoprotein beta-1,2-N-acetylglucosaminyltransferase	2.79	0.009643
TNFSF13B	tumor necrosis factor (ligand) superfamily, member 13b	2.79	0.007671
ENTPD7	ectonucleoside triphosphate diphosphohydrolase 7	2.78	0.002437
QKI	QKI, KH domain containing, RNA binding	2.78	0.002153
HIPK2	homeodomain interacting protein kinase 2	2.77	0.00691
MGC12916	uncharacterized protein MGC12916	2.77	0.042807
RP11-242C19.2	novel transcript, sense intronic to GK	2.77	0.043081
ACSL5	acyl-CoA synthetase long-chain family member 5	2.76	0.002615
IFNAR1	interferon (alpha, beta and omega) receptor 1	2.76	0.00086
LOC100505474	uncharacterized LOC100505474	2.76	0.009274
C6orf62	chromosome 6 open reading frame 62	2.75	0.000992
RNU7-40P	RNA, U7 small nuclear 40 pseudogene	2.75	0.017892
USP38	ubiquitin specific peptidase 38	2.75	0.000817
FTH1P3	ferritin, heavy polypeptide 1 pseudogene 3	2.74	0.019502
LPAR1	lysophosphatidic acid receptor 1	2.74	0.00223
PRRX2	paired related homeobox 2	2.74	0.003148
SRP19	signal recognition particle 19kDa	2.74	0.010363
COG3	component of oligomeric golgi complex 3	2.73	0.011947
GTPBP4	GTP binding protein 4	2.73	0.011227
TLR3	toll-like receptor 3	2.73	0.00151
C6orf132	chromosome 6 open reading frame 132	2.72	0.000791
CPED1	cadherin-like and PC-esterase domain containing 1	2.72	0.005205
PNPLA8	patatin-like phospholipase domain containing 8	2.72	0.001363
HMGCS1	3-hydroxy-3-methylglutaryl-CoA synthase 1 (soluble)	2.71	0.023503
MOB3B	MOB kinase activator 3B	2.71	0.004831
TRIB1	tribbles pseudokinase 1	2.71	0.006833
H3F3B; H3F3A; MIR4738	H3 histone, family 3B (H3.3B); H3 histone, family 3A; microRNA 4738	2.7	0.000843
CCNJ	cyclin J	2.7	0.003053
COL4A1	collagen, type IV, alpha 1	2.7	0.019974
DNAJB9	DnaJ (Hsp40) homolog, subfamily B, member 9	2.7	0.001734
SMURF2	SMAD specific E3 ubiquitin protein ligase 2	2.7	0.002153
RP11-352D3.2	novel protein	2.68	0.005468
BLZF1	basic leucine zipper nuclear factor 1	2.67	0.011369
EAF1	ELL associated factor 1	2.67	0.000355
FOCAD	focadhesin	2.67	0.005035
PANK3	pantothenate kinase 3	2.67	0.005731
PARP8	poly (ADP-ribose) polymerase family, member 8	2.67	0.000472
GTF2B	general transcription factor IIB	2.65	0.004001
NAPG	N-ethylmaleimide-sensitive factor attachment protein, gamma	2.64	0.026156
RNU7-76P	RNA, U7 small nuclear 76 pseudogene	2.64	0.025828
TBX3	T-box 3	2.64	0.006258
JPH2	junctophilin 2	2.62	0.019859
PSMA3	proteasome (prosome, macropain) subunit, alpha type, 3	2.62	0.008668
ARHGEF2	Rho/Rac guanine nucleotide exchange factor (GEF) 2	2.61	0.000265
DCUN1D5	DCN1, defective in cullin neddylation 1, domain containing 5	2.61	0.004957
PDCD5	programmed cell death 5	2.61	0.000472
BTAF1	BTAF1 RNA polymerase II, B-TFIID transcription factor-associated, 170kDa	2.6	0.002352
SDE2	SDE2 telomere maintenance homolog (S. pombe)	2.6	0.002764
AGTR1	angiotensin II receptor, type 1	2.59	0.024973
LOC100130476	uncharacterized LOC100130476	2.59	0.00182
RAB21	RAB21, member RAS oncogene family	2.59	0.004027
SIAH2	siah E3 ubiquitin protein ligase 2	2.59	0.004315
TTC39B	tetratricopeptide repeat domain 39B	2.59	0.013403
ZCCHC6	zinc finger, CCHC domain containing 6	2.59	0.003902
GABPB1	GA binding protein transcription factor, beta subunit 1	2.58	0.000724
KRT33A	keratin 33A	2.58	0.043798
PCNX	pecanex homolog (Drosophila)	2.58	0.000203
SEC14L2	SEC14-like 2 (S. cerevisiae)	2.58	0.000676
SLC2A6	solute carrier family 2 (facilitated glucose transporter), member 6	2.58	0.002768
GABRA2	gamma-aminobutyric acid (GABA) A receptor, alpha 2	2.57	0.005058
IKBKE	inhibitor of kappa light polypeptide gene enhancer in B-cells, kinase epsilon	2.57	0.000874
MICB	MHC class I polypeptide-related sequence B	2.57	0.004655
TAB3	TGF-beta activated kinase 1/MAP3K7 binding protein 3	2.57	0.001369
TJP2	tight junction protein 2	2.57	0.002946
ARL5B	ADP-ribosylation factor-like 5B	2.56	0.008334
GRIA3	glutamate receptor, ionotropic, AMPA 3	2.56	0.008971
NAV2-AS1	NAV2 antisense RNA 1	2.56	0.000225
NFIB	nuclear factor I/B	2.56	0.05474
PIGV	phosphatidylinositol glycan anchor biosynthesis, class V	2.56	0.003148
RAB8B	RAB8B, member RAS oncogene family	2.56	0.009359
SEC23B	Sec23 homolog B (S. cerevisiae)	2.56	0.020489
TRIP10	thyroid hormone receptor interactor 10	2.56	0.001318
CELF1	CUGBP, Elav-like family member 1	2.55	0.002238
DUSP6	dual specificity phosphatase 6	2.55	0.002489
HMGN2P46	high mobility group nucleosomal binding domain 2 pseudogene 46	2.55	0.016104
ITPRIP	inositol 1,4,5-trisphosphate receptor interacting protein	2.55	0.049901
MPZL1	myelin protein zero-like 1	2.55	0.009899
MT1G	metallothionein 1G	2.55	0.002437
PSEN1	presenilin 1	2.55	0.000719
RASA2	RAS p21 protein activator 2	2.55	0.013135
LITAF	lipopolysaccharide-induced TNF factor	2.54	0.001026
KLF9	Kruppel-like factor 9	2.53	0.007035
SECISBP2L	SECIS binding protein 2-like	2.53	0.004189
SFPQ	splicing factor proline/glutamine-rich	2.53	0.005387
FADS3	fatty acid desaturase 3	2.52	0.004064
HERC1	HECT and RLD domain containing E3 ubiquitin protein ligase family member 1	2.52	0.002757
NPC1	Niemann-Pick disease, type C1	2.52	0.011901
NUPL1	nucleoporin like 1	2.52	0.009141
BPGM	2,3-bisphosphoglycerate mutase	2.51	0.018857
C8orf4	chromosome 8 open reading frame 4	2.51	0.007877
CBLB	Cbl proto-oncogene B, E3 ubiquitin protein ligase	2.51	0.014786
RNF114	ring finger protein 114	2.5	0.001947
WARS	tryptophanyl-tRNA synthetase	2.5	0.006202
GLI3	GLI family zinc finger 3	2.49	0.024698
NUDCD1	NudC domain containing 1	2.49	0.005349
RNF24	ring finger protein 24	2.49	0.006872
COTL1	coactosin-like F-actin binding protein 1	2.48	0.001658
MLKL	mixed lineage kinase domain-like	2.48	0.040018
RELA	v-rel avian reticuloendotheliosis viral oncogene homolog A	2.48	0.000302
C5orf56	chromosome 5 open reading frame 56	2.47	0.00611
PHACTR1	phosphatase and actin regulator 1	2.47	0.005553
PPP4R2	protein phosphatase 4, regulatory subunit 2	2.47	0.003975
AC017002.2	novel transcript	2.46	0.044763
DNAJC3	DnaJ (Hsp40) homolog, subfamily C, member 3	2.46	0.093521
LINC00641	long intergenic non-protein coding RNA 641	2.46	0.010918
MRPL32	mitochondrial ribosomal protein L32	2.46	0.001335
STX12	syntaxin 12	2.46	0.003875
AC104777.2	novel transcript	2.44	0.003983
NEURL1B	neuralized E3 ubiquitin protein ligase 1B	2.44	0.060175
MIR22HG	MIR22 host gene (non-protein coding)	2.43	0.024653
HSPH1	heat shock 105kDa/110kDa protein 1	2.43	0.01268
NAB1	NGFI-A binding protein 1 (EGR1 binding protein 1)	2.43	0.001105
NFKBIB	nuclear factor of kappa light polypeptide gene enhancer in B-cells inhibitor, beta	2.43	0.002464
SCAF4	SR-related CTD-associated factor 4	2.43	0.00295
LRRC59	leucine rich repeat containing 59	2.42	0.056779
NCEH1	neutral cholesterol ester hydrolase 1	2.42	0.028172
PIP5K1A	phosphatidylinositol-4-phosphate 5-kinase, type I, alpha	2.42	0.004927
RC3H2	ring finger and CCCH-type domains 2	2.42	0.001468
MIR4308	microRNA 4308	2.41	0.019274
BTN2A1	butyrophilin, subfamily 2, member A1	2.41	0.004687
COQ10B	coenzyme Q10 homolog B (S. cerevisiae)	2.41	0.001597
ELOVL5	ELOVL fatty acid elongase 5	2.41	0.015592
LYRM4	LYR motif containing 4	2.41	0.001121
MARK3	MAP/microtubule affinity-regulating kinase 3	2.41	0.001318
PDE8A	phosphodiesterase 8A	2.41	0.008438
PHF11	PHD finger protein 11	2.41	0.024314
ACO1	aconitase 1, soluble	2.4	0.017834
CPEB4	cytoplasmic polyadenylation element binding protein 4	2.4	0.002106
CYP51A1	cytochrome P450, family 51, subfamily A, polypeptide 1	2.4	0.002648
FOXC1	forkhead box C1	2.4	0.001512
XYLT1	xylosyltransferase I	2.4	0.015823
CKS2	CDC28 protein kinase regulatory subunit 2	2.39	0.00897
EPB41L4A	erythrocyte membrane protein band 4.1 like 4A	2.39	0.001318
ZDHHC9	zinc finger, DHHC-type containing 9	2.39	0.017217
TUBB2A	tubulin, beta 2A class IIa	2.38	0.040842
EIF2AK3	eukaryotic translation initiation factor 2-alpha kinase 3	2.37	0.027769
ICOSLG	inducible T-cell co-stimulator ligand	2.37	0.001293
SPATA5L1	spermatogenesis associated 5-like 1	2.37	0.001787
DIP2C	DIP2 disco-interacting protein 2 homolog C (Drosophila)	2.36	0.001266
YPEL2	yippee-like 2 (Drosophila)	2.36	0.059728
ABCC1	ATP-binding cassette, sub-family C (CFTR/MRP), member 1	2.35	0.000265
CDK12	cyclin-dependent kinase 12	2.35	0.001104
SRFBP1	serum response factor binding protein 1	2.35	0.017328
VNN1	vanin 1	2.35	0.00898
DAPK2	death-associated protein kinase 2	2.34	0.000434
FLJ46875	uncharacterized LOC440918	2.34	0.025895
HECTD2	HECT domain containing E3 ubiquitin protein ligase 2	2.34	0.003043
APOBEC3G	apolipoprotein B mRNA editing enzyme, catalytic polypeptide-like 3G	2.33	0.003101
CASP10	caspase 10, apoptosis-related cysteine peptidase	2.33	0.00284
NOP58	NOP58 ribonucleoprotein	2.33	0.018569
P2RX7	purinergic receptor P2X, ligand-gated ion channel, 7	2.33	0.053584
PNRC1	proline-rich nuclear receptor coactivator 1	2.33	0.066195
ELL	elongation factor RNA polymerase II	2.32	0.005392
GBP7	guanylate binding protein 7	2.32	0.004212
NFATC1	nuclear factor of activated T-cells, cytoplasmic, calcineurin-dependent 1	2.32	0.005311
OSER1	oxidative stress responsive serine-rich 1	2.32	0.005958
PDE4B	phosphodiesterase 4B, cAMP-specific	2.32	0.042823
PSMB8	proteasome (prosome, macropain) subunit, beta type, 8	2.32	0.008089
TRIM47	tripartite motif containing 47	2.32	0.001483
TWIST2	twist family bHLH transcription factor 2	2.32	0.011817
ELF3	E74-like factor 3 (ets domain transcription factor, epithelial-specific )	2.31	0.006059
KIAA1279	KIAA1279	2.31	0.005345
PIGA	phosphatidylinositol glycan anchor biosynthesis, class A	2.31	0.012673
PPRC1	peroxisome proliferator-activated receptor gamma, coactivator-related 1	2.31	0.013788
SOAT1	sterol O-acyltransferase 1	2.31	0.005738
TBK1	TANK-binding kinase 1	2.31	0.006108
B3GNT5	UDP-GlcNAc:betaGal beta-1,3-N-acetylglucosaminyltransferase 5	2.3	0.008416
LINC00890	long intergenic non-protein coding RNA 890	2.3	0.013529
AC104777.1	putative novel transcript	2.29	0.006672
E2F3-IT1	E2F3 intronic transcript 1 (non-protein coding)	2.29	0.015476
GNL3	guanine nucleotide binding protein-like 3 (nucleolar)	2.29	0.021508
KIAA1644	KIAA1644	2.29	0.063817
NIFK	nucleolar protein interacting with the FHA domain of MKI67	2.29	0.002876
SLC16A6P1	SLC16A6 pseudogene 1	2.29	0.045224
HELZ2	helicase with zinc finger 2, transcriptional coactivator	2.27	0.003164
NSUN2	NOP2/Sun RNA methyltransferase family, member 2	2.27	0.00774
SP100	SP100 nuclear antigen	2.27	0.009932
KIAA0020	KIAA0020	2.26	0.023841
MGLL	monoglyceride lipase	2.26	0.013812
SNORD12C	small nucleolar RNA, C/D box 12C	2.26	0.023181
TMOD3	tropomodulin 3 (ubiquitous)	2.26	0.012698
ALG2	ALG2, alpha-1,3/1,6-mannosyltransferase	2.25	0.007968
ID4	inhibitor of DNA binding 4, dominant negative helix-loop-helix protein	2.25	0.022239
PMM2	phosphomannomutase 2	2.25	0.044482
RP11-318K15.2	putative novel transcript	2.25	0.0488
RSPO3	R-spondin 3	2.25	0.017959
TAB3-AS2	TAB3 antisense RNA 2	2.25	0.014985
ZNF462	zinc finger protein 462	2.25	0.004021
LUZP1	leucine zipper protein 1	2.24	0.001978
STAT3	signal transducer and activator of transcription 3 (acute-phase response factor)	2.24	0.009779
KCTD5	potassium channel tetramerization domain containing 5	2.23	0.005269
KDM6B	lysine (K)-specific demethylase 6B	2.23	0.06815
RNU6-654P	RNA, U6 small nuclear 654, pseudogene	2.23	0.014544
SNN	stannin	2.23	0.045522
TMX1	thioredoxin-related transmembrane protein 1	2.23	0.005954
CDC42SE2	CDC42 small effector 2	2.22	0.001894
ETF1	eukaryotic translation termination factor 1	2.22	0.002358
FAM126A	family with sequence similarity 126, member A	2.22	0.009497
FOSL1	FOS-like antigen 1	2.22	0.02157
PHLDA2	pleckstrin homology-like domain, family A, member 2	2.22	0.012453
STK4	serine/threonine kinase 4	2.22	0.017834
UBR1	ubiquitin protein ligase E3 component n-recognin 1	2.22	0.000169
SP140L	SP140 nuclear body protein-like	2.21	0.005794
TMF1	TATA element modulatory factor 1	2.21	0.017352
AK4P3	adenylate kinase 4 pseudogene 3	2.2	0.008974
EIF4A1P2	eukaryotic translation initiation factor 4A1 pseudogene 2	2.2	0.047604
ESPL1	extra spindle pole bodies homolog 1 (S. cerevisiae)	2.2	0.012426
LINC00189	long intergenic non-protein coding RNA 189	2.2	0.030244
LINC00936	long intergenic non-protein coding RNA 936	2.2	0.020041
PCGF5	polycomb group ring finger 5	2.2	0.003693
PXK	PX domain containing serine/threonine kinase	2.2	0.014356
RP11-395B7.7	novel transcript, overlapping TRIM56	2.2	0.028285
SPAG1	sperm associated antigen 1	2.2	0.008668
ASAP2	ArfGAP with SH3 domain, ankyrin repeat and PH domain 2	2.19	0.004517
BTN3A3	butyrophilin, subfamily 3, member A3	2.19	0.00163
PDE12	phosphodiesterase 12	2.19	0.014294
ARHGAP24	Rho GTPase activating protein 24	2.18	0.002933
INTS6	integrator complex subunit 6	2.18	0.000398
PPP1R18	protein phosphatase 1, regulatory subunit 18	2.18	0.006059
SNAP25	synaptosomal-associated protein, 25kDa	2.18	0.069119
UBE2L6	ubiquitin-conjugating enzyme E2L 6	2.18	0.000308
DDX18	DEAD (Asp-Glu-Ala-Asp) box polypeptide 18	2.17	0.003743
TRIM56	tripartite motif containing 56	2.17	0.003975
C8orf46	chromosome 8 open reading frame 46	2.16	0.07811
ETV6	ets variant 6	2.16	0.004638
INO80D	INO80 complex subunit D	2.16	0.00355
MOB3C	MOB kinase activator 3C	2.16	0.006001
MIR125B1	microRNA 125b-1	2.15	0.006718
EPG5	ectopic P-granules autophagy protein 5 homolog (C. elegans)	2.15	0.000791
HERPUD1	homocysteine-inducible, endoplasmic reticulum stress-inducible, ubiquitin-like domain member 1	2.15	0.00895
MYB-AS1	MYB antisense RNA 1	2.15	0.047861
NECAP2	NECAP endocytosis associated 2	2.15	0.000954
PHLDA1	pleckstrin homology-like domain, family A, member 1	2.15	0.064952
RIOK1	RIO kinase 1	2.15	0.006274
SLC15A3	solute carrier family 15 (oligopeptide transporter), member 3	2.15	0.008758
ZCCHC17	zinc finger, CCHC domain containing 17	2.15	0.000384
APOLD1	apolipoprotein L domain containing 1	2.14	0.029864
GNPDA2	glucosamine-6-phosphate deaminase 2	2.14	0.019997
ITPR2	inositol 1,4,5-trisphosphate receptor, type 2	2.14	0.000719
MAFF	v-maf avian musculoaponeurotic fibrosarcoma oncogene homolog F	2.14	0.003053
NEFM	neurofilament, medium polypeptide	2.14	0.029555
PSMA6	proteasome (prosome, macropain) subunit, alpha type, 6	2.14	0.007281
RP11-10J5.1	putative novel transcript	2.14	0.01534
SMIM13	small integral membrane protein 13	2.14	0.000914
TMED5	transmembrane emp24 protein transport domain containing 5	2.14	0.003786
BEST1	bestrophin 1	2.13	0.003252
CD58	CD58 molecule	2.13	0.015853
COL5A2	collagen, type V, alpha 2	2.13	0.002725
CSPG4	chondroitin sulfate proteoglycan 4	2.13	0.03932
DTX2	deltex 2, E3 ubiquitin ligase	2.13	0.016929
MAK16	MAK16 homolog (S. cerevisiae)	2.13	0.010714
CHST15	carbohydrate (N-acetylgalactosamine 4-sulfate 6-O) sulfotransferase 15	2.12	0.003743
OPTN	optineurin	2.12	0.00136
STK40	serine/threonine kinase 40	2.12	0.006912
TIAM2	T-cell lymphoma invasion and metastasis 2	2.12	0.006982
VAV2	vav 2 guanine nucleotide exchange factor	2.12	0.000535
CCNT1	cyclin T1	2.11	0.002701
CEBPD	CCAAT/enhancer binding protein (C/EBP), delta	2.11	0.008839
FLJ32255	uncharacterized LOC643977	2.11	0.039515
LOC100132891	uncharacterized LOC100132891	2.11	0.006097
SHQ1	SHQ1, H/ACA ribonucleoprotein assembly factor	2.11	0.018521
SLC22A4	solute carrier family 22 (organic cation/zwitterion transporter), member 4	2.11	0.001343
TAF1D; MIR1304	TATA box binding protein (TBP)-associated factor, RNA polymerase I, D, 41kDa; microRNA 1304	2.1	0.006059
ATP13A3	ATPase type 13A3	2.1	0.006041
ID3	inhibitor of DNA binding 3, dominant negative helix-loop-helix protein	2.1	0.080981
IL32	interleukin 32	2.1	0.02227
RYBP	RING1 and YY1 binding protein	2.1	0.005873
SMAD7	SMAD family member 7	2.1	0.002143
UBASH3B	ubiquitin associated and SH3 domain containing B	2.1	0.015958
ASAP1	ArfGAP with SH3 domain, ankyrin repeat and PH domain 1	2.09	0.003003
CCL13	chemokine (C-C motif) ligand 13	2.09	0.010399
DHX36	DEAH (Asp-Glu-Ala-His) box polypeptide 36	2.09	0.005627
HIST1H2AI	histone cluster 1, H2ai	2.09	0.018243
IL13RA2	interleukin 13 receptor, alpha 2	2.09	0.018182
PRMT1	protein arginine methyltransferase 1	2.09	0.001104
SLC16A7	solute carrier family 16 (monocarboxylate transporter), member 7	2.09	0.014037
TNC	tenascin C	2.09	0.04419
TOR1AIP1	torsin A interacting protein 1	2.09	0.025894
CLIC4	chloride intracellular channel 4	2.08	0.0147
RASGRP1	RAS guanyl releasing protein 1 (calcium and DAG-regulated)	2.08	0.002792
SEC24A	SEC24 family member A	2.08	0.028203
SLFN12	schlafen family member 12	2.08	0.00714
TRIM8	tripartite motif containing 8	2.08	0.006524
FAM124A	family with sequence similarity 124A	2.07	0.004576
LRIF1	ligand dependent nuclear receptor interacting factor 1	2.07	0.006222
MDGA1	MAM domain containing glycosylphosphatidylinositol anchor 1	2.07	0.009497
NUMB	numb homolog (Drosophila)	2.07	0.002339
PPIF	peptidylprolyl isomerase F	2.07	0.032899
SNORD101	small nucleolar RNA, C/D box 101	2.07	0.010247
SNORD4B	small nucleolar RNA, C/D box 4B	2.07	0.006516
UHRF1BP1	UHRF1 binding protein 1	2.07	0.006001
ARL13B	ADP-ribosylation factor-like 13B	2.06	0.009533
DUSP5	dual specificity phosphatase 5	2.06	0.005544
FGF5	fibroblast growth factor 5	2.06	0.023032
FILIP1	filamin A interacting protein 1	2.06	0.012668
GNG2	guanine nucleotide binding protein (G protein), gamma 2	2.06	0.00378
PGAP1	post-GPI attachment to proteins 1	2.06	0.007841
RLF	rearranged L-myc fusion	2.06	0.006446
RP11-465N4.4	novel transcript	2.06	0.084589
EBLN2	endogenous Bornavirus-like nucleoprotein 2	2.05	0.016733
HMGCR	3-hydroxy-3-methylglutaryl-CoA reductase	2.05	0.097475
TRIM38	tripartite motif containing 38	2.05	0.020714
BACH1	BTB and CNC homology 1, basic leucine zipper transcription factor 1	2.04	0.009173
CHD1	chromodomain helicase DNA binding protein 1	2.04	0.021479
DICER1	dicer 1, ribonuclease type III	2.04	0.006707
HIAT1	hippocampus abundant transcript 1	2.04	0.010567
MICAL3	microtubule associated monooxygenase, calponin and LIM domain containing 3	2.04	0.003704
NUS1	nuclear undecaprenyl pyrophosphate synthase 1 homolog (S. cerevisiae)	2.04	0.045395
PPFIA2	protein tyrosine phosphatase, receptor type, f polypeptide (PTPRF), interacting protein (liprin), alpha 2	2.04	0.023957
PSMB8-AS1	PSMB8 antisense RNA 1 (head to head)	2.04	0.006718
BMP2	bone morphogenetic protein 2	2.03	0.089172
CCDC82	coiled-coil domain containing 82	2.03	0.008233
CLEC2B	C-type lectin domain family 2, member B	2.03	0.007841
COX17	COX17 cytochrome c oxidase copper chaperone	2.03	0.016224
DAXX	death-domain associated protein	2.03	0.000548
DUSP16	dual specificity phosphatase 16	2.03	0.00187
POMP	proteasome maturation protein	2.03	0.001293
SEC23IP	SEC23 interacting protein	2.03	0.005327
ACKR4	atypical chemokine receptor 4	2.02	0.002437
CCND3	cyclin D3	2.02	0.002255
NFE2L3	nuclear factor, erythroid 2-like 3	2.02	0.00204
NRAS	neuroblastoma RAS viral (v-ras) oncogene homolog	2.02	0.030449
PPARD	peroxisome proliferator-activated receptor delta	2.02	0.026528
AFF4	AF4/FMR2 family, member 4	2.01	0.003567
LRRC8B	leucine rich repeat containing 8 family, member B	2.01	0.012214
NFATC2	nuclear factor of activated T-cells, cytoplasmic, calcineurin-dependent 2	2.01	0.039303
RASGEF1B	RasGEF domain family, member 1B	2.01	0.000608
TMEFF1	transmembrane protein with EGF-like and two follistatin-like domains 1	2.01	0.001831
UBE2E1	ubiquitin-conjugating enzyme E2E 1	2.01	0.010838
ZNF800	zinc finger protein 800	2.01	0.009366
KIAA1033	KIAA1033	2	0.004045
LTV1	LTV1 ribosome biogenesis factor	2	0.020489
PRRC2C	proline-rich coiled-coil 2C	2	0.002669
RP11-439L18.2	putative novel transcript	2	0.001465
S100A3	S100 calcium binding protein A3	2	0.014831
SRSF12	serine/arginine-rich splicing factor 12	2	0.001214
C2orf88	chromosome 2 open reading frame 88	-2	0.034533
LPAR3	lysophosphatidic acid receptor 3	-2	0.039942
LRRC1	leucine rich repeat containing 1	-2	0.006934
PARP2	poly (ADP-ribose) polymerase 2	-2	0.031746
PYGL	phosphorylase, glycogen, liver	-2	0.026615
RNPC3	RNA-binding region (RNP1, RRM) containing 3	-2	0.006934
SYNE1	spectrin repeat containing, nuclear envelope 1	-2	0.004606
TBC1D4	TBC1 domain family, member 4	-2	0.004394
ADAMTS9-AS2	ADAMTS9 antisense RNA 2	-2.01	0.05641
GLTSCR1L	GLTSCR1-like	-2.01	0.000313
HEATR6	HEAT repeat containing 6	-2.01	0.005288
KIAA1551	KIAA1551	-2.01	0.027888
LOC440434	aminopeptidase puromycin sensitive pseudogene	-2.01	0.00528
LRRC37A2	leucine rich repeat containing 37, member A2	-2.01	0.000977
MAP4K5	mitogen-activated protein kinase kinase kinase kinase 5	-2.01	0.003199
RP11-37E23.5	putative novel transcript	-2.01	0.06177
RSRP1	arginine/serine-rich protein 1	-2.01	0.005833
SAP30	Sin3A-associated protein, 30kDa	-2.01	0.016286
TMEM200A	transmembrane protein 200A	-2.01	0.007712
TTC3	tetratricopeptide repeat domain 3	-2.01	0.005327
USP32P2	ubiquitin specific peptidase 32 pseudogene 2	-2.01	0.003497
C18orf54	chromosome 18 open reading frame 54	-2.02	0.014904
GPR135	G protein-coupled receptor 135	-2.02	0.012733
HIST1H2AC	histone cluster 1, H2ac	-2.02	0.00611
LINC01391	long intergenic non-protein coding RNA 1391	-2.02	0.034245
NKTR	natural killer cell triggering receptor	-2.02	0.011922
PPFIBP1	PTPRF interacting protein, binding protein 1 (liprin beta 1)	-2.02	0.014708
ZNF480	zinc finger protein 480	-2.02	0.013407
EEF2K	eukaryotic elongation factor-2 kinase	-2.03	0.006389
ZZZ3	zinc finger, ZZ-type containing 3	-2.03	0.008089
FAM217B	family with sequence similarity 217, member B	-2.04	0.000513
GUSBP4	glucuronidase, beta pseudogene 4	-2.04	0.00746
LRCH2	leucine-rich repeats and calponin homology (CH) domain containing 2	-2.04	0.003545
MAGI3	membrane associated guanylate kinase, WW and PDZ domain containing 3	-2.04	0.002024
MMP16	matrix metallopeptidase 16 (membrane-inserted)	-2.04	0.06523
OSBPL10	oxysterol binding protein-like 10	-2.04	0.015945
PAQR7	progestin and adipoQ receptor family member VII	-2.04	0.065703
SRGAP2	SLIT-ROBO Rho GTPase activating protein 2	-2.04	0.002252
WDR41	WD repeat domain 41	-2.04	0.038229
ZBTB38	zinc finger and BTB domain containing 38	-2.04	0.046777
ZNF600	zinc finger protein 600	-2.04	0.071768
CTPS2	CTP synthase 2	-2.05	0.006912
HLTF	helicase-like transcription factor	-2.05	0.003304
LOC285074	anaphase promoting complex subunit 1 pseudogene	-2.05	0.028583
PRIM1	primase, DNA, polypeptide 1 (49kDa)	-2.05	0.007558
PTCD2	pentatricopeptide repeat domain 2	-2.05	0.005723
SETD8	SET domain containing (lysine methyltransferase) 8	-2.05	0.019418
ZFP14	ZFP14 zinc finger protein	-2.05	0.024461
ZNF436	zinc finger protein 436	-2.05	0.039855
C15orf65	chromosome 15 open reading frame 65	-2.06	0.036751
CSRNP3	cysteine-serine-rich nuclear protein 3	-2.06	0.007035
NAP1L3	nucleosome assembly protein 1-like 3	-2.06	0.037564
NR2F2-AS1	NR2F2 antisense RNA 1	-2.06	0.073229
TNS3	tensin 3	-2.06	0.042696
TPST1	tyrosylprotein sulfotransferase 1	-2.06	0.002272
ZNF740	zinc finger protein 740	-2.06	0.000425
MIR548A3	microRNA 548a-3	-2.07	0.09803
ARMCX1	armadillo repeat containing, X-linked 1	-2.07	0.006753
AXIN2	axin 2	-2.07	0.009499
CYP2R1	cytochrome P450, family 2, subfamily R, polypeptide 1	-2.07	0.027286
FAT4	FAT atypical cadherin 4	-2.07	0.00844
FMO1	flavin containing monooxygenase 1	-2.07	0.06319
MRFAP1L1	Morf4 family associated protein 1-like 1	-2.07	0.007134
PCDHGB8P	protocadherin gamma subfamily B, 8 pseudogene	-2.07	0.033378
PDK2	pyruvate dehydrogenase kinase, isozyme 2	-2.07	0.005457
PDP2	pyruvate dehyrogenase phosphatase catalytic subunit 2	-2.07	0.00205
SYTL5	synaptotagmin-like 5	-2.07	0.027148
TCF21	transcription factor 21	-2.07	0.042943
UHRF2	ubiquitin-like with PHD and ring finger domains 2, E3 ubiquitin protein ligase	-2.07	0.004095
ZCCHC11	zinc finger, CCHC domain containing 11	-2.07	0.012937
ZNF70	zinc finger protein 70	-2.07	0.009365
ANKS1A	ankyrin repeat and sterile alpha motif domain containing 1A	-2.08	0.004315
C9orf106	chromosome 9 open reading frame 106	-2.08	0.010661
CYGB	cytoglobin	-2.08	0.058508
DBT	dihydrolipoamide branched chain transacylase E2	-2.08	0.000415
FMN2	formin 2	-2.08	0.005107
GTF2A1L	general transcription factor IIA, 1-like	-2.08	0.006819
KIAA0754	KIAA0754	-2.08	0.094719
ZNF844	zinc finger protein 844	-2.08	0.005349
CAMK2G	calcium/calmodulin-dependent protein kinase II gamma	-2.09	0.000728
FLRT3	fibronectin leucine rich transmembrane protein 3	-2.09	0.050531
RP11-539L10.3	novel transcript	-2.09	0.032785
AADAT	aminoadipate aminotransferase	-2.1	0.0273
CTTNBP2	cortactin binding protein 2	-2.1	0.012765
HIST1H2BG	histone cluster 1, H2bg	-2.1	0.063338
KIAA0513	KIAA0513	-2.1	0.012235
PLAGL1	pleiomorphic adenoma gene-like 1	-2.1	0.032566
RERE	arginine-glutamic acid dipeptide (RE) repeats	-2.1	0.001653
LOC100133050	glucuronidase, beta pseudogene	-2.11	0.01122
NXPH3	neurexophilin 3	-2.11	0.002615
TMEM106B	transmembrane protein 106B	-2.11	0.004045
TMEM119	transmembrane protein 119	-2.11	0.025636
ABCC5	ATP-binding cassette, sub-family C (CFTR/MRP), member 5	-2.12	0.002545
BMI1	BMI1 proto-oncogene, polycomb ring finger	-2.12	0.006059
DCAF5	DDB1 and CUL4 associated factor 5	-2.12	0.006443
IL1RAPL1	interleukin 1 receptor accessory protein-like 1	-2.12	0.062403
MIA3	melanoma inhibitory activity family, member 3	-2.12	0.030301
NREP	neuronal regeneration related protein	-2.12	0.002742
HEIH	hepatocellular carcinoma up-regulated EZH2-associated long non-coding RNA	-2.13	0.03978
MGC57346	uncharacterized LOC401884	-2.13	0.020341
CEP120	centrosomal protein 120kDa	-2.14	0.010339
MSL1	male-specific lethal 1 homolog (Drosophila)	-2.14	0.003638
NAA16	N(alpha)-acetyltransferase 16, NatA auxiliary subunit	-2.14	0.003396
PDF	peptide deformylase (mitochondrial)	-2.14	0.025639
AKTIP	AKT interacting protein	-2.15	0.007922
ANKRD36C	ankyrin repeat domain 36C	-2.15	0.06582
LAMA4	laminin, alpha 4	-2.15	0.00293
PIAS3	protein inhibitor of activated STAT, 3	-2.15	0.022239
PKIA	protein kinase (cAMP-dependent, catalytic) inhibitor alpha	-2.15	0.012252
STK38	serine/threonine kinase 38	-2.15	0.002309
BACE1-AS	BACE1 antisense RNA	-2.16	0.018332
EFNA4	ephrin-A4	-2.16	0.067642
FAM179B	family with sequence similarity 179, member B	-2.16	0.003085
HOXA11-AS	HOXA11 antisense RNA	-2.16	0.001478
PLXDC2	plexin domain containing 2	-2.16	0.020966
SNX2	sorting nexin 2	-2.16	0.012037
SYPL2	synaptophysin-like 2	-2.16	0.08505
TCAIM	T cell activation inhibitor, mitochondrial	-2.16	0.001105
ASPM	asp (abnormal spindle) homolog, microcephaly associated (Drosophila)	-2.17	0.038216
PLEKHH2	pleckstrin homology domain containing, family H (with MyTH4 domain) member 2	-2.17	0.035173
APC	adenomatous polyposis coli	-2.18	0.003164
ARL17A	ADP-ribosylation factor-like 17A	-2.18	0.039725
ASF1A	anti-silencing function 1A histone chaperone	-2.18	0.01401
CITED2	Cbp/p300-interacting transactivator, with Glu/Asp-rich carboxy-terminal domain, 2	-2.18	0.021105
HERC2P2	hect domain and RLD 2 pseudogene 2	-2.18	0.087151
KBTBD6	kelch repeat and BTB (POZ) domain containing 6	-2.18	0.017951
NID2	nidogen 2 (osteonidogen)	-2.18	0.013767
SLC39A10	solute carrier family 39 (zinc transporter), member 10	-2.18	0.059789
TRIM2	tripartite motif containing 2	-2.18	0.023099
MIR581	microRNA 581	-2.19	0.032714
FAM63B	family with sequence similarity 63, member B	-2.19	0.025565
KANK1	KN motif and ankyrin repeat domains 1	-2.19	0.00163
KIAA0430	KIAA0430	-2.19	0.004448
LOC100272216	uncharacterized LOC100272216	-2.19	0.0494
OGT	O-linked N-acetylglucosamine (GlcNAc) transferase	-2.19	0.006267
RP11-88I18.2	novel transcript, antisense to PGM5	-2.19	0.081824
TRHDE-AS1	TRHDE antisense RNA 1	-2.19	0.006611
ZBED5	zinc finger, BED-type containing 5	-2.19	0.008347
KANSL1	KAT8 regulatory NSL complex subunit 1	-2.2	0.008668
NARS2	asparaginyl-tRNA synthetase 2, mitochondrial (putative)	-2.2	0.013012
SEPP1	selenoprotein P, plasma, 1	-2.2	0.013012
VWA5A	von Willebrand factor A domain containing 5A	-2.2	0.032179
CD248	CD248 molecule, endosialin	-2.21	0.004786
HDAC5	histone deacetylase 5	-2.21	0.00038
LINC01139	long intergenic non-protein coding RNA 1139	-2.21	0.066848
LRRC2	leucine rich repeat containing 2	-2.21	0.063195
ANKRA2	ankyrin repeat, family A (RFXANK-like), 2	-2.22	0.043328
ETV1	ets variant 1	-2.22	0.004308
FKBP7	FK506 binding protein 7	-2.22	0.002792
GLIS2	GLIS family zinc finger 2	-2.22	0.015823
PCMTD2	protein-L-isoaspartate (D-aspartate) O-methyltransferase domain containing 2	-2.22	0.027493
RFXAP	regulatory factor X-associated protein	-2.22	0.001369
RP1-69D17.3	putative novel transcript	-2.22	0.02085
KIAA1377	KIAA1377	-2.23	0.004849
PSIP1	PC4 and SFRS1 interacting protein 1	-2.23	0.012021
TBC1D19	TBC1 domain family, member 19	-2.23	0.021109
AC019186.1	putative novel transcript	-2.24	0.054699
FRMD6	FERM domain containing 6	-2.24	0.018609
MBOAT1	membrane bound O-acyltransferase domain containing 1	-2.24	0.002792
PLCE1	phospholipase C, epsilon 1	-2.24	0.000854
RCAN2	regulator of calcineurin 2	-2.24	0.037535
SHPRH	SNF2 histone linker PHD RING helicase, E3 ubiquitin protein ligase	-2.24	0.014737
TRIB2	tribbles pseudokinase 2	-2.24	0.018587
DST	dystonin	-2.25	0.012835
RP3-445N2.1	putative novel transcript	-2.25	0.026866
MIR570	microRNA 570	-2.26	0.065727
DCBLD1	discoidin, CUB and LCCL domain containing 1	-2.26	0.002255
NR1D1	nuclear receptor subfamily 1, group D, member 1	-2.26	0.024725
SERTAD4-AS1	SERTAD4 antisense RNA 1	-2.26	0.015662
ARL4D	ADP-ribosylation factor-like 4D	-2.27	0.003936
CMAHP	cytidine monophospho-N-acetylneuraminic acid hydroxylase, pseudogene	-2.27	0.023309
DCP1B	decapping mRNA 1B	-2.27	0.000979
DLC1	DLC1 Rho GTPase activating protein	-2.27	0.004106
NR1D2	nuclear receptor subfamily 1, group D, member 2	-2.27	0.015593
TULP3	tubby like protein 3	-2.27	0.000739
YLPM1	YLP motif containing 1	-2.27	0.07486
LINC01021	long intergenic non-protein coding RNA 1021	-2.28	0.049036
SYT11	synaptotagmin XI	-2.28	0.013812
UACA	uveal autoantigen with coiled-coil domains and ankyrin repeats	-2.28	0.048752
AKAP8L	A kinase (PRKA) anchor protein 8-like	-2.29	0.010774
ARHGAP23	Rho GTPase activating protein 23	-2.29	0.014336
DNMBP	dynamin binding protein	-2.29	0.026402
ITGA3	integrin, alpha 3 (antigen CD49C, alpha 3 subunit of VLA-3 receptor)	-2.29	0.003671
KIT	v-kit Hardy-Zuckerman 4 feline sarcoma viral oncogene homolog	-2.29	0.019102
PCNXL2	pecanex-like 2 (Drosophila)	-2.29	0.015182
PLAG1	pleiomorphic adenoma gene 1	-2.29	0.020124
RP11-347C18.3	novel transcript	-2.29	0.003975
SNX18	sorting nexin 18	-2.29	0.003431
FBXO31	F-box protein 31	-2.3	0.021978
NUMBL	numb homolog (Drosophila)-like	-2.3	0.015465
PIP4K2B	phosphatidylinositol-5-phosphate 4-kinase, type II, beta	-2.3	0.011366
WEE1	WEE1 G2 checkpoint kinase	-2.3	0.055785
APPL2	adaptor protein, phosphotyrosine interaction, PH domain and leucine zipper containing 2	-2.31	0.004033
COL14A1	collagen, type XIV, alpha 1	-2.31	0.009846
ESR1	estrogen receptor 1	-2.31	0.02859
MIS18BP1	MIS18 binding protein 1	-2.31	0.067931
MTCL1	microtubule crosslinking factor 1	-2.31	0.000941
RARB	retinoic acid receptor, beta	-2.31	0.005132
ACYP1	acylphosphatase 1, erythrocyte (common) type	-2.32	0.052283
DCLRE1A	DNA cross-link repair 1A	-2.32	0.012431
SLC25A36	solute carrier family 25 (pyrimidine nucleotide carrier ), member 36	-2.32	0.005317
ANKMY2	ankyrin repeat and MYND domain containing 2	-2.33	0.005392
FHL2	four and a half LIM domains 2	-2.33	0.028657
FUT10	fucosyltransferase 10 (alpha (1,3) fucosyltransferase)	-2.33	0.01227
OSGEPL1	O-sialoglycoprotein endopeptidase-like 1	-2.33	0.00838
CTD-2334D19.1	novel transcript	-2.34	0.027493
MANSC1	MANSC domain containing 1	-2.34	0.005947
MAP1A	microtubule-associated protein 1A	-2.34	0.003754
PCDH7	protocadherin 7	-2.34	0.058913
VASN	vasorin	-2.34	0.035977
EHBP1	EH domain binding protein 1	-2.35	0.002771
IRF2BPL	interferon regulatory factor 2 binding protein-like	-2.35	0.033713
METAP1	methionyl aminopeptidase 1	-2.35	0.000667
F2R	coagulation factor II (thrombin) receptor	-2.36	0.012494
FAM115A	family with sequence similarity 115, member A	-2.36	0.041962
RP11-10N23.2	novel transcript	-2.36	0.072407
ZHX3	zinc fingers and homeoboxes 3	-2.36	0.004497
ERRFI1	ERBB receptor feedback inhibitor 1	-2.37	0.034172
MBNL2	muscleblind-like splicing regulator 2	-2.37	0.005601
MKX	mohawk homeobox	-2.37	0.023842
ACSS3	acyl-CoA synthetase short-chain family member 3	-2.38	0.017154
ARID4A	AT rich interactive domain 4A (RBP1-like)	-2.38	0.005328
CDCA7L	cell division cycle associated 7-like	-2.38	0.010241
CREBRF	CREB3 regulatory factor	-2.38	0.040708
JARID2	jumonji, AT rich interactive domain 2	-2.38	0.008684
CNN2	calponin 2	-2.39	0.00979
FAM214A	family with sequence similarity 214, member A	-2.39	0.014135
FAM65B	family with sequence similarity 65, member B	-2.39	0.030397
KIAA0825	KIAA0825	-2.39	0.006504
LRP6	low density lipoprotein receptor-related protein 6	-2.39	0.092051
MCU	mitochondrial calcium uniporter	-2.39	0.003987
RTKN2	rhotekin 2	-2.39	0.008147
SCAI	suppressor of cancer cell invasion	-2.39	0.002535
TSHZ1	teashirt zinc finger homeobox 1	-2.39	0.016739
MCM6	minichromosome maintenance complex component 6	-2.4	0.001808
ABHD10	abhydrolase domain containing 10	-2.41	0.004303
EPB41	erythrocyte membrane protein band 4.1	-2.41	0.03078
SH3BGRL2	SH3 domain binding glutamate-rich protein like 2	-2.41	0.032592
SMC3	structural maintenance of chromosomes 3	-2.41	0.005099
TMEM35	transmembrane protein 35	-2.41	0.031725
IGIP	IgA-inducing protein	-2.42	0.007638
TNFRSF19	tumor necrosis factor receptor superfamily, member 19	-2.42	0.002719
ZC2HC1A	zinc finger, C2HC-type containing 1A	-2.42	0.046307
AGO1	argonaute RISC catalytic component 1	-2.43	0.010878
CASP2	caspase 2, apoptosis-related cysteine peptidase	-2.43	0.005477
LOC400590	uncharacterized LOC400590	-2.43	0.019289
SMAD6	SMAD family member 6	-2.43	0.006513
SPIN4	spindlin family, member 4	-2.43	0.072194
TCF7L2	transcription factor 7-like 2 (T-cell specific, HMG-box)	-2.43	0.012687
DPY19L4	dpy-19-like 4 (C. elegans)	-2.44	0.0079
ITFG2	integrin alpha FG-GAP repeat containing 2	-2.44	0.002499
SMARCA2	SWI/SNF related, matrix associated, actin dependent regulator of chromatin, subfamily a, member 2	-2.44	0.002324
CHD9	chromodomain helicase DNA binding protein 9	-2.45	0.005833
EYA1	EYA transcriptional coactivator and phosphatase 1	-2.45	0.010016
FAM102B	family with sequence similarity 102, member B	-2.45	0.006833
LOC100506834	uncharacterized LOC100506834	-2.45	0.056734
MTUS1	microtubule associated tumor suppressor 1	-2.45	0.012938
SIPA1L1	signal-induced proliferation-associated 1 like 1	-2.45	0.006258
MIR548I3	microRNA 548i-3	-2.46	0.079236
ADCY9	adenylate cyclase 9	-2.46	0.008614
GLT8D2	glycosyltransferase 8 domain containing 2	-2.46	0.031746
KDELR3	KDEL (Lys-Asp-Glu-Leu) endoplasmic reticulum protein retention receptor 3	-2.46	0.095978
ZNF248	zinc finger protein 248	-2.46	0.001978
FAM106CP	family with sequence similarity 106, member C pseudogene	-2.47	0.084113
KLHL24	kelch-like family member 24	-2.47	0.032709
NAIP	NLR family, apoptosis inhibitory protein	-2.47	0.014577
RP11-427M20.1	novel transcript	-2.47	0.027321
SLC43A1	solute carrier family 43 (amino acid system L transporter), member 1	-2.47	0.034268
SLC9A7	solute carrier family 9, subfamily A (NHE7, cation proton antiporter 7), member 7	-2.47	0.003099
LPCAT2	lysophosphatidylcholine acyltransferase 2	-2.48	0.017692
SIN3A	SIN3 transcription regulator family member A	-2.48	0.002933
ARRB1	arrestin, beta 1	-2.49	0.083858
GUSBP1	glucuronidase, beta pseudogene 1	-2.49	0.013008
SLC9A6	solute carrier family 9, subfamily A (NHE6, cation proton antiporter 6), member 6	-2.49	0.004481
WLS	wntless Wnt ligand secretion mediator	-2.49	0.023841
PGM5P2	phosphoglucomutase 5 pseudogene 2	-2.5	0.02564
PXN	paxillin	-2.5	0.076718
DACH1	dachshund family transcription factor 1	-2.52	0.011947
SSBP2	single-stranded DNA binding protein 2	-2.53	0.023076
ZBED8	zinc finger, BED-type containing 8	-2.53	0.014473
ARHGAP21	Rho GTPase activating protein 21	-2.54	0.002143
CDKL1	cyclin-dependent kinase-like 1 (CDC2-related kinase)	-2.54	0.000144
ANKRD10-IT1	ANKRD10 intronic transcript 1 (non-protein coding)	-2.55	0.077016
VSTM4	V-set and transmembrane domain containing 4	-2.55	0.00187
ZMYM3	zinc finger, MYM-type 3	-2.55	0.001566
LINC00984	long intergenic non-protein coding RNA 984	-2.56	0.004716
MIR29A	microRNA 29a	-2.57	0.04468
MTSS1L	metastasis suppressor 1-like	-2.57	0.001214
UFSP2	UFM1-specific peptidase 2	-2.57	0.020159
CCDC14	coiled-coil domain containing 14	-2.58	0.003198
CCDC144CP	coiled-coil domain containing 144C, pseudogene	-2.58	0.062821
LXN	latexin	-2.58	0.038095
MAP3K12	mitogen-activated protein kinase kinase kinase 12	-2.58	0.019834
RCOR3	REST corepressor 3	-2.58	0.00136
ITGA6	integrin, alpha 6	-2.59	0.000622
ASXL3	additional sex combs like transcriptional regulator 3	-2.6	0.012806
CARHSP1	calcium regulated heat stable protein 1, 24kDa	-2.6	0.02284
GCLC	glutamate-cysteine ligase, catalytic subunit	-2.6	0.029864
SNHG8	small nucleolar RNA host gene 8 (non-protein coding)	-2.6	0.011369
IER5L	immediate early response 5-like	-2.61	0.050122
TMEM57	transmembrane protein 57	-2.61	0.003531
CAPRIN2	caprin family member 2	-2.63	0.010372
HEG1	heart development protein with EGF-like domains 1	-2.63	0.001684
PDCD4; MIR4680	programmed cell death 4 (neoplastic transformation inhibitor); microRNA 4680	-2.64	0.004831
MBD5	methyl-CpG binding domain protein 5	-2.64	0.002269
MOXD1	monooxygenase, DBH-like 1	-2.64	0.015569
SFRP1	secreted frizzled-related protein 1	-2.64	0.019472
PLEKHA5	pleckstrin homology domain containing, family A member 5	-2.66	0.005387
AUH	AU RNA binding protein/enoyl-CoA hydratase	-2.67	0.016992
CREB3L1	cAMP responsive element binding protein 3-like 1	-2.67	0.013008
ANKRD50	ankyrin repeat domain 50	-2.68	0.001226
SLC6A6	solute carrier family 6 (neurotransmitter transporter), member 6	-2.69	0.058903
KIF13A	kinesin family member 13A	-2.7	0.002309
MITF	microphthalmia-associated transcription factor	-2.7	0.0032
NFYB	nuclear transcription factor Y, beta	-2.7	0.00337
SCN2A	sodium channel, voltage-gated, type II, alpha subunit	-2.71	0.00753
GS1-5L10.1	novel transcript	-2.72	0.007567
PTGER2	prostaglandin E receptor 2 (subtype EP2), 53kDa	-2.72	0.005289
SLC25A27	solute carrier family 25, member 27	-2.72	0.030171
NUMA1	nuclear mitotic apparatus protein 1	-2.73	0.008525
REV3L	REV3-like, polymerase (DNA directed), zeta, catalytic subunit	-2.73	0.008896
ANGPT1	angiopoietin 1	-2.74	0.048379
RUFY3	RUN and FYVE domain containing 3	-2.74	0.007712
SMAD9	SMAD family member 9	-2.74	0.000844
DNM1P47	DNM1 pseudogene 47	-2.75	0.006303
ZNF215	zinc finger protein 215	-2.75	0.010306
AMOT; MIR4329	angiomotin; microRNA 4329	-2.77	0.007078
TRIM59	tripartite motif containing 59	-2.77	0.002142
UBE2E3	ubiquitin-conjugating enzyme E2E 3	-2.77	0.017773
ROCK2	Rho-associated, coiled-coil containing protein kinase 2	-2.78	0.00611
MIR503	microRNA 503	-2.79	0.009157
GPX8	glutathione peroxidase 8 (putative)	-2.8	0.02175
KIZ	kizuna centrosomal protein	-2.81	0.019289
FAM171A2	family with sequence similarity 171, member A2	-2.82	0.015336
KLF12	Kruppel-like factor 12	-2.82	0.009932
OXR1	oxidation resistance 1	-2.82	0.032079
PDGFRB	platelet-derived growth factor receptor, beta polypeptide	-2.82	0.010942
PLCB1-IT1	PLCB1 intronic transcript 1 (non-protein coding)	-2.82	0.09436
CSRP2	cysteine and glycine-rich protein 2	-2.83	0.005799
FENDRR	FOXF1 adjacent non-coding developmental regulatory RNA	-2.83	0.005152
FAM117B	family with sequence similarity 117, member B	-2.84	0.044118
GAB1	GRB2-associated binding protein 1	-2.84	0.002843
PBX1	pre-B-cell leukemia homeobox 1	-2.84	0.008347
SNHG18	small nucleolar RNA host gene 18 (non-protein coding)	-2.84	0.025895
ABHD4	abhydrolase domain containing 4	-2.86	0.006833
PBX3	pre-B-cell leukemia homeobox 3	-2.86	0.001947
SIX2	SIX homeobox 2	-2.86	0.022245
TOX	thymocyte selection-associated high mobility group box	-2.86	0.064292
MIR450A1	microRNA 450a-1	-2.87	0.019319
MAP3K4	mitogen-activated protein kinase kinase kinase 4	-2.88	0.006423
PRIM2	primase, DNA, polypeptide 2 (58kDa)	-2.88	0.00324
ARMC9	armadillo repeat containing 9	-2.9	0.02003
MRVI1	murine retrovirus integration site 1 homolog	-2.9	0.004189
RECK	reversion-inducing-cysteine-rich protein with kazal motifs	-2.9	0.014101
SPTLC2	serine palmitoyltransferase, long chain base subunit 2	-2.9	0.005891
ALDH3A2	aldehyde dehydrogenase 3 family, member A2	-2.91	0.003858
PDE3A	phosphodiesterase 3A, cGMP-inhibited	-2.91	0.007259
SSFA2	sperm specific antigen 2	-2.91	0.005947
FOXL2	forkhead box L2	-2.93	0.008039
GJA1	gap junction protein, alpha 1, 43kDa	-2.93	0.002334
ZNF292	zinc finger protein 292	-2.93	0.009789
AHNAK2	AHNAK nucleoprotein 2	-2.94	0.002942
LDB2	LIM domain binding 2	-2.95	0.009572
KRTAP1-5	keratin associated protein 1-5	-2.96	0.035439
SNORD107	small nucleolar RNA, C/D box 107	-2.96	0.062346
ZNF280D	zinc finger protein 280D	-2.97	0.004166
ARHGAP35	Rho GTPase activating protein 35	-2.99	0.000567
TLE1	transducin-like enhancer of split 1 (E(sp1) homolog, Drosophila)	-3	0.002792
SMPDL3A	sphingomyelin phosphodiesterase, acid-like 3A	-3.01	0.010306
SPRY1	sprouty homolog 1, antagonist of FGF signaling (Drosophila)	-3.01	0.084841
EDA2R	ectodysplasin A2 receptor	-3.02	0.007683
GNA14	guanine nucleotide binding protein (G protein), alpha 14	-3.03	0.039934
MEIS2	Meis homeobox 2	-3.04	0.002339
CCDC144B	coiled-coil domain containing 144B (pseudogene)	-3.05	0.077766
ZDHHC7	zinc finger, DHHC-type containing 7	-3.05	0.004446
FOXP2	forkhead box P2	-3.06	0.010168
PTPN13	protein tyrosine phosphatase, non-receptor type 13 (APO-1/CD95 (Fas)-associated phosphatase)	-3.06	0.027917
MIR1299	microRNA 1299	-3.07	0.009128
DISP1	dispatched homolog 1 (Drosophila)	-3.07	0.007897
HMCN1	hemicentin 1	-3.07	0.006172
HOTTIP	HOXA distal transcript antisense RNA	-3.07	0.000929
LOC101927258	uncharacterized LOC101927258	-3.07	0.051229
PDK4	pyruvate dehydrogenase kinase, isozyme 4	-3.08	0.096861
DOCK11	dedicator of cytokinesis 11	-3.1	0.00151
EMX2	empty spiracles homeobox 2	-3.11	0.004648
SYDE2	synapse defective 1, Rho GTPase, homolog 2 (C. elegans)	-3.11	0.000387
CEP162	centrosomal protein 162kDa	-3.12	0.009996
KIAA0355	KIAA0355	-3.14	0.001501
AC012065.7	novel transcript	-3.17	0.012235
CROT	carnitine O-octanoyltransferase	-3.17	0.016059
MLLT10	myeloid/lymphoid or mixed-lineage leukemia (trithorax homolog, Drosophila)	-3.17	0.005613
ZBTB4	zinc finger and BTB domain containing 4	-3.17	0.004069
LMO7	LIM domain 7	-3.18	0.008032
CLDN11	claudin 11	-3.19	0.023798
GLCCI1	glucocorticoid induced transcript 1	-3.2	0.006631
RNU6-1226P	RNA, U6 small nuclear 1226, pseudogene	-3.2	0.098474
GAS1	growth arrest-specific 1	-3.22	0.017305
SNORD123	small nucleolar RNA, C/D box 123	-3.23	0.012571
MIR450A2	microRNA 450a-2	-3.24	0.046419
C15orf41	chromosome 15 open reading frame 41	-3.24	0.003092
DDB2	damage-specific DNA binding protein 2, 48kDa	-3.25	0.009166
FBXL20	F-box and leucine-rich repeat protein 20	-3.25	0.027973
ITGA11	integrin, alpha 11	-3.25	0.028804
MAF	v-maf avian musculoaponeurotic fibrosarcoma oncogene homolog	-3.25	0.003252
SETDB2	SET domain, bifurcated 2	-3.25	0.001216
HIBCH	3-hydroxyisobutyryl-CoA hydrolase	-3.26	0.004765
SMA4	glucuronidase, beta pseudogene	-3.26	0.002437
MUM1	melanoma associated antigen (mutated) 1	-3.32	0.006819
ARHGAP18	Rho GTPase activating protein 18	-3.33	0.005365
COL8A1	collagen, type VIII, alpha 1	-3.33	0.02227
SNORD108	small nucleolar RNA, C/D box 108	-3.34	0.030415
HIST1H2AE	histone cluster 1, H2ae	-3.36	0.008676
KIAA0922	KIAA0922	-3.37	0.005833
HOXA10	homeobox A10	-3.38	0.000799
TLE1P1	transducin-like enhancer of split 1 pseudogene 1	-3.4	0.005217
FAM171B	family with sequence similarity 171, member B	-3.41	0.007199
JMY	junction mediating and regulatory protein, p53 cofactor	-3.43	0.03052
TENC1	tensin like C1 domain containing phosphatase (tensin 2)	-3.44	0.003099
RIN2	Ras and Rab interactor 2	-3.45	0.002387
SETBP1	SET binding protein 1	-3.45	0.006202
CALHM2	calcium homeostasis modulator 2	-3.46	0.004949
ITGA4	integrin, alpha 4 (antigen CD49D, alpha 4 subunit of VLA-4 receptor)	-3.46	0.009146
TCP11L2	t-complex 11, testis-specific-like 2	-3.46	0.008962
ZNF608	zinc finger protein 608	-3.49	0.014422
KAT6B	K(lysine) acetyltransferase 6B	-3.51	0.007159
FBLN1	fibulin 1	-3.54	0.025134
LINC00478	long intergenic non-protein coding RNA 478	-3.54	0.085152
LURAP1L	leucine rich adaptor protein 1-like	-3.55	0.016702
PER3	period circadian clock 3	-3.55	0.027852
F2RL2	coagulation factor II (thrombin) receptor-like 2	-3.56	0.013835
NR2F1	nuclear receptor subfamily 2, group F, member 1	-3.56	0.004949
PRICKLE1	prickle homolog 1 (Drosophila)	-3.57	0.000732
DHRS3	dehydrogenase/reductase (SDR family) member 3	-3.58	0.031436
GUCY1B3	guanylate cyclase 1, soluble, beta 3	-3.58	0.0019
ADAMTS5	ADAM metallopeptidase with thrombospondin type 1 motif, 5	-3.59	0.00611
FZD4	frizzled class receptor 4	-3.61	0.001808
BCL9	B-cell CLL/lymphoma 9	-3.63	0.002008
STIM2	stromal interaction molecule 2	-3.63	0.002504
SOCS5	suppressor of cytokine signaling 5	-3.65	0.0258
MIR4737	microRNA 4737	-3.67	0.005738
MKL2	MKL/myocardin-like 2	-3.67	0.022026
INTS8	integrator complex subunit 8	-3.73	0.009313
NUAK1	NUAK family, SNF1-like kinase, 1	-3.73	0.004339
TRAM2	translocation associated membrane protein 2	-3.73	0.002319
AKAP9	A kinase (PRKA) anchor protein 9	-3.76	0.048061
EPHB3	EPH receptor B3	-3.77	0.004004
GUSBP3	glucuronidase, beta pseudogene 3	-3.77	0.00464
PRSS12	protease, serine, 12 (neurotrypsin, motopsin)	-3.82	0.012593
TSPAN5	tetraspanin 5	-3.83	0.003007
GUSBP9	glucuronidase, beta pseudogene 9	-3.84	0.005468
NEXN	nexilin (F actin binding protein)	-3.9	0.009354
PMP22	peripheral myelin protein 22	-3.92	0.001637
HIST1H1E	histone cluster 1, H1e	-4	0.020688
MIR143HG	MIR143 host gene (non-protein coding)	-4.02	0.00028
TRPC4	transient receptor potential cation channel, subfamily C, member 4	-4.05	0.009572
ATP8B1	ATPase, aminophospholipid transporter, class I, type 8B, member 1	-4.32	0.007465
IL17RD	interleukin 17 receptor D	-4.35	0.002951
GUSBP2	glucuronidase, beta pseudogene 2	-4.39	0.008614
TXNRD1	thioredoxin reductase 1	-4.44	0.002005
ZNF521	zinc finger protein 521	-4.44	0.00969
ARHGAP20	Rho GTPase activating protein 20	-4.45	0.008028
RASL11A	RAS-like, family 11, member A	-4.45	0.010237
RHOBTB1	Rho-related BTB domain containing 1	-4.46	0.000254
LDB1	LIM domain binding 1	-4.49	0.008274
SERTAD4	SERTA domain containing 4	-4.54	0.001566
SNCAIP	synuclein, alpha interacting protein	-4.54	0.016935
SLC7A14	solute carrier family 7, member 14	-4.59	0.077836
PPP1R3C	protein phosphatase 1, regulatory subunit 3C	-4.71	0.003567
EGR1	early growth response 1	-4.74	0.090526
NCOA2	nuclear receptor coactivator 2	-4.76	0.000971
LOC100653061	beta-glucuronidase-like protein SMA4-like	-4.8	0.009452
TENM4	teneurin transmembrane protein 4	-4.93	0.052407
BAG2	BCL2-associated athanogene 2	-5.07	0.011279
SLC2A12	solute carrier family 2 (facilitated glucose transporter), member 12	-5.23	0.005387
TMEM200B	transmembrane protein 200B	-5.37	0.005217
SLC38A1	solute carrier family 38, member 1	-5.39	0.00075
CDC42EP3	CDC42 effector protein (Rho GTPase binding) 3	-5.49	0.016751
FIGN	fidgetin	-5.51	0.000328
MOSPD1	motile sperm domain containing 1	-5.71	0.002979
SESN3	sestrin 3	-5.84	0.003516
GPSM2	G-protein signaling modulator 2	-6.1	0.001293
PLEKHG1	pleckstrin homology domain containing, family G (with RhoGef domain) member 1	-6.1	0.022669
HOXA11	homeobox A11	-6.35	0.001121
PCDH18	protocadherin 18	-6.87	0.012902
DCN	decorin	-7.16	0.013931
NR2F2; MIR1469	nuclear receptor subfamily 2, group F, member 2; microRNA 1469	-7.33	0.000719
LRIG3	leucine-rich repeats and immunoglobulin-like domains 3	-7.77	0.012668
RGS2	regulator of G-protein signaling 2	-7.9	0.009804
DKK1	dickkopf WNT signaling pathway inhibitor 1	-8	0.004273
CTGF	connective tissue growth factor	-8.02	0.012962
AJUBA	ajuba LIM protein	-8.06	0.000206
OSR2	odd-skipped related transciption factor 2	-8.95	0.001369
TP53INP1	tumor protein p53 inducible nuclear protein 1	-9.3	0.005685
PDE5A	phosphodiesterase 5A, cGMP-specific	-10.57	0.00445
FAXDC2	fatty acid hydroxylase domain containing 2	-10.83	0.000902
RUNX1T1	runt-related transcription factor 1	-10.93	0.003007
HTR2B	5-hydroxytryptamine (serotonin) receptor 2B, G protein-coupled	-11.99	0.000413
ADAMTS1	ADAM metallopeptidase with thrombospondin type 1 motif, 1	-12.14	0.0311
ZFP36L2	ZFP36 ring finger protein-like 2	-12.67	0.013608
CHRM2	cholinergic receptor, muscarinic 2	-12.76	0.004161
SLC40A1	solute carrier family 40 (iron-regulated transporter), member 1	-13.69	0.003928
PIK3R1	phosphoinositide-3-kinase, regulatory subunit 1 (alpha)	-19.1	0.001831
SLC38A2	solute carrier family 38, member 2	-23.76	0.00355
HOXA13	homeobox A13	-24.61	0.000719
