# Supplementary material for: Progesterone Receptor Signaling Selectively Modulates Cytokine-Induced Global Gene Expression in Human Cervical Stromal Cells
Source: Front Genet. 2020 Sep 11;11:883. doi: 10.3389/fgene.2020.00883 (PMC7517718; doi:10.3389/fgene.2020.00883)
Supplement: Supplementary file 12 [file Table_12.XLSX]

## Sheet: Sheet1
TABLE S12. Differential expression of mature miRNAs based on expression profiling using the NanoString platform in cervical stromal fibroblasts.
Mature miRNA	miRBase Accession No.	IL-1β vs. Veh Fold Change	IL-1β vs. Veh FDR p-value	P4 vs. Veh Fold Change	P4 vs. Veh FDR p-value	P4 + IL-1β vs. Veh Fold Change	P4 + IL-1β vs. Veh FDR p-value
hsa-miR-100-5p	MIMAT0000098	-1.0376	n.s.	-1.25455	0.088821	-1.1531	0.0376732
hsa-miR-125a-5p	MIMAT0000443	-1.03316	n.s.	-1.32793	0.0338954	-1.2354	0.0984665
hsa-miR-146a-5p	MIMAT0000449	2.12437	0.0125541	1.14918	n.s.	1.90557	0.0123096
hsa-miR-147a	MIMAT0000251	-2.13793	0.026573	-1.12704	n.s.	-1.25526	n.s.
hsa-miR-1915-3p	MIMAT0007892	-1.31281	n.s.	-1.49245	n.s.	-1.6124	0.0145959
hsa-miR-221-3p	MIMAT0000278	1.03632	n.s.	-1.39073	0.0322999	-1.17121	n.s.
hsa-miR-29a-3p	MIMAT0000086	1.63962	n.s.	1.53485	0.0633537	1.76875	0.0527878
hsa-miR-320e	MIMAT0015072	1.53978	0.0881976	1.36524	n.s.	1.40738	n.s.
hsa-miR-642a-3p	MIMAT0020924	-1.18444	n.s.	-1.38098	n.s.	-1.92135	0.0530504
Notes: n.s., not significant
